# Supplementary material for: A machine learning-derived gene signature of programmed cell death reveals diagnostic biomarkers in dilated cardiomyopathy
Source: Research Square preprint supplement (doi:10.21203/rs.3.rs-7170433/v1), 2025-08-11
Supplement: Supplementary file 1 [file 6fe3cba1ae3325a0f531d759.docx]

**Supplementary Material**

1. **Supplementary Figures**

**
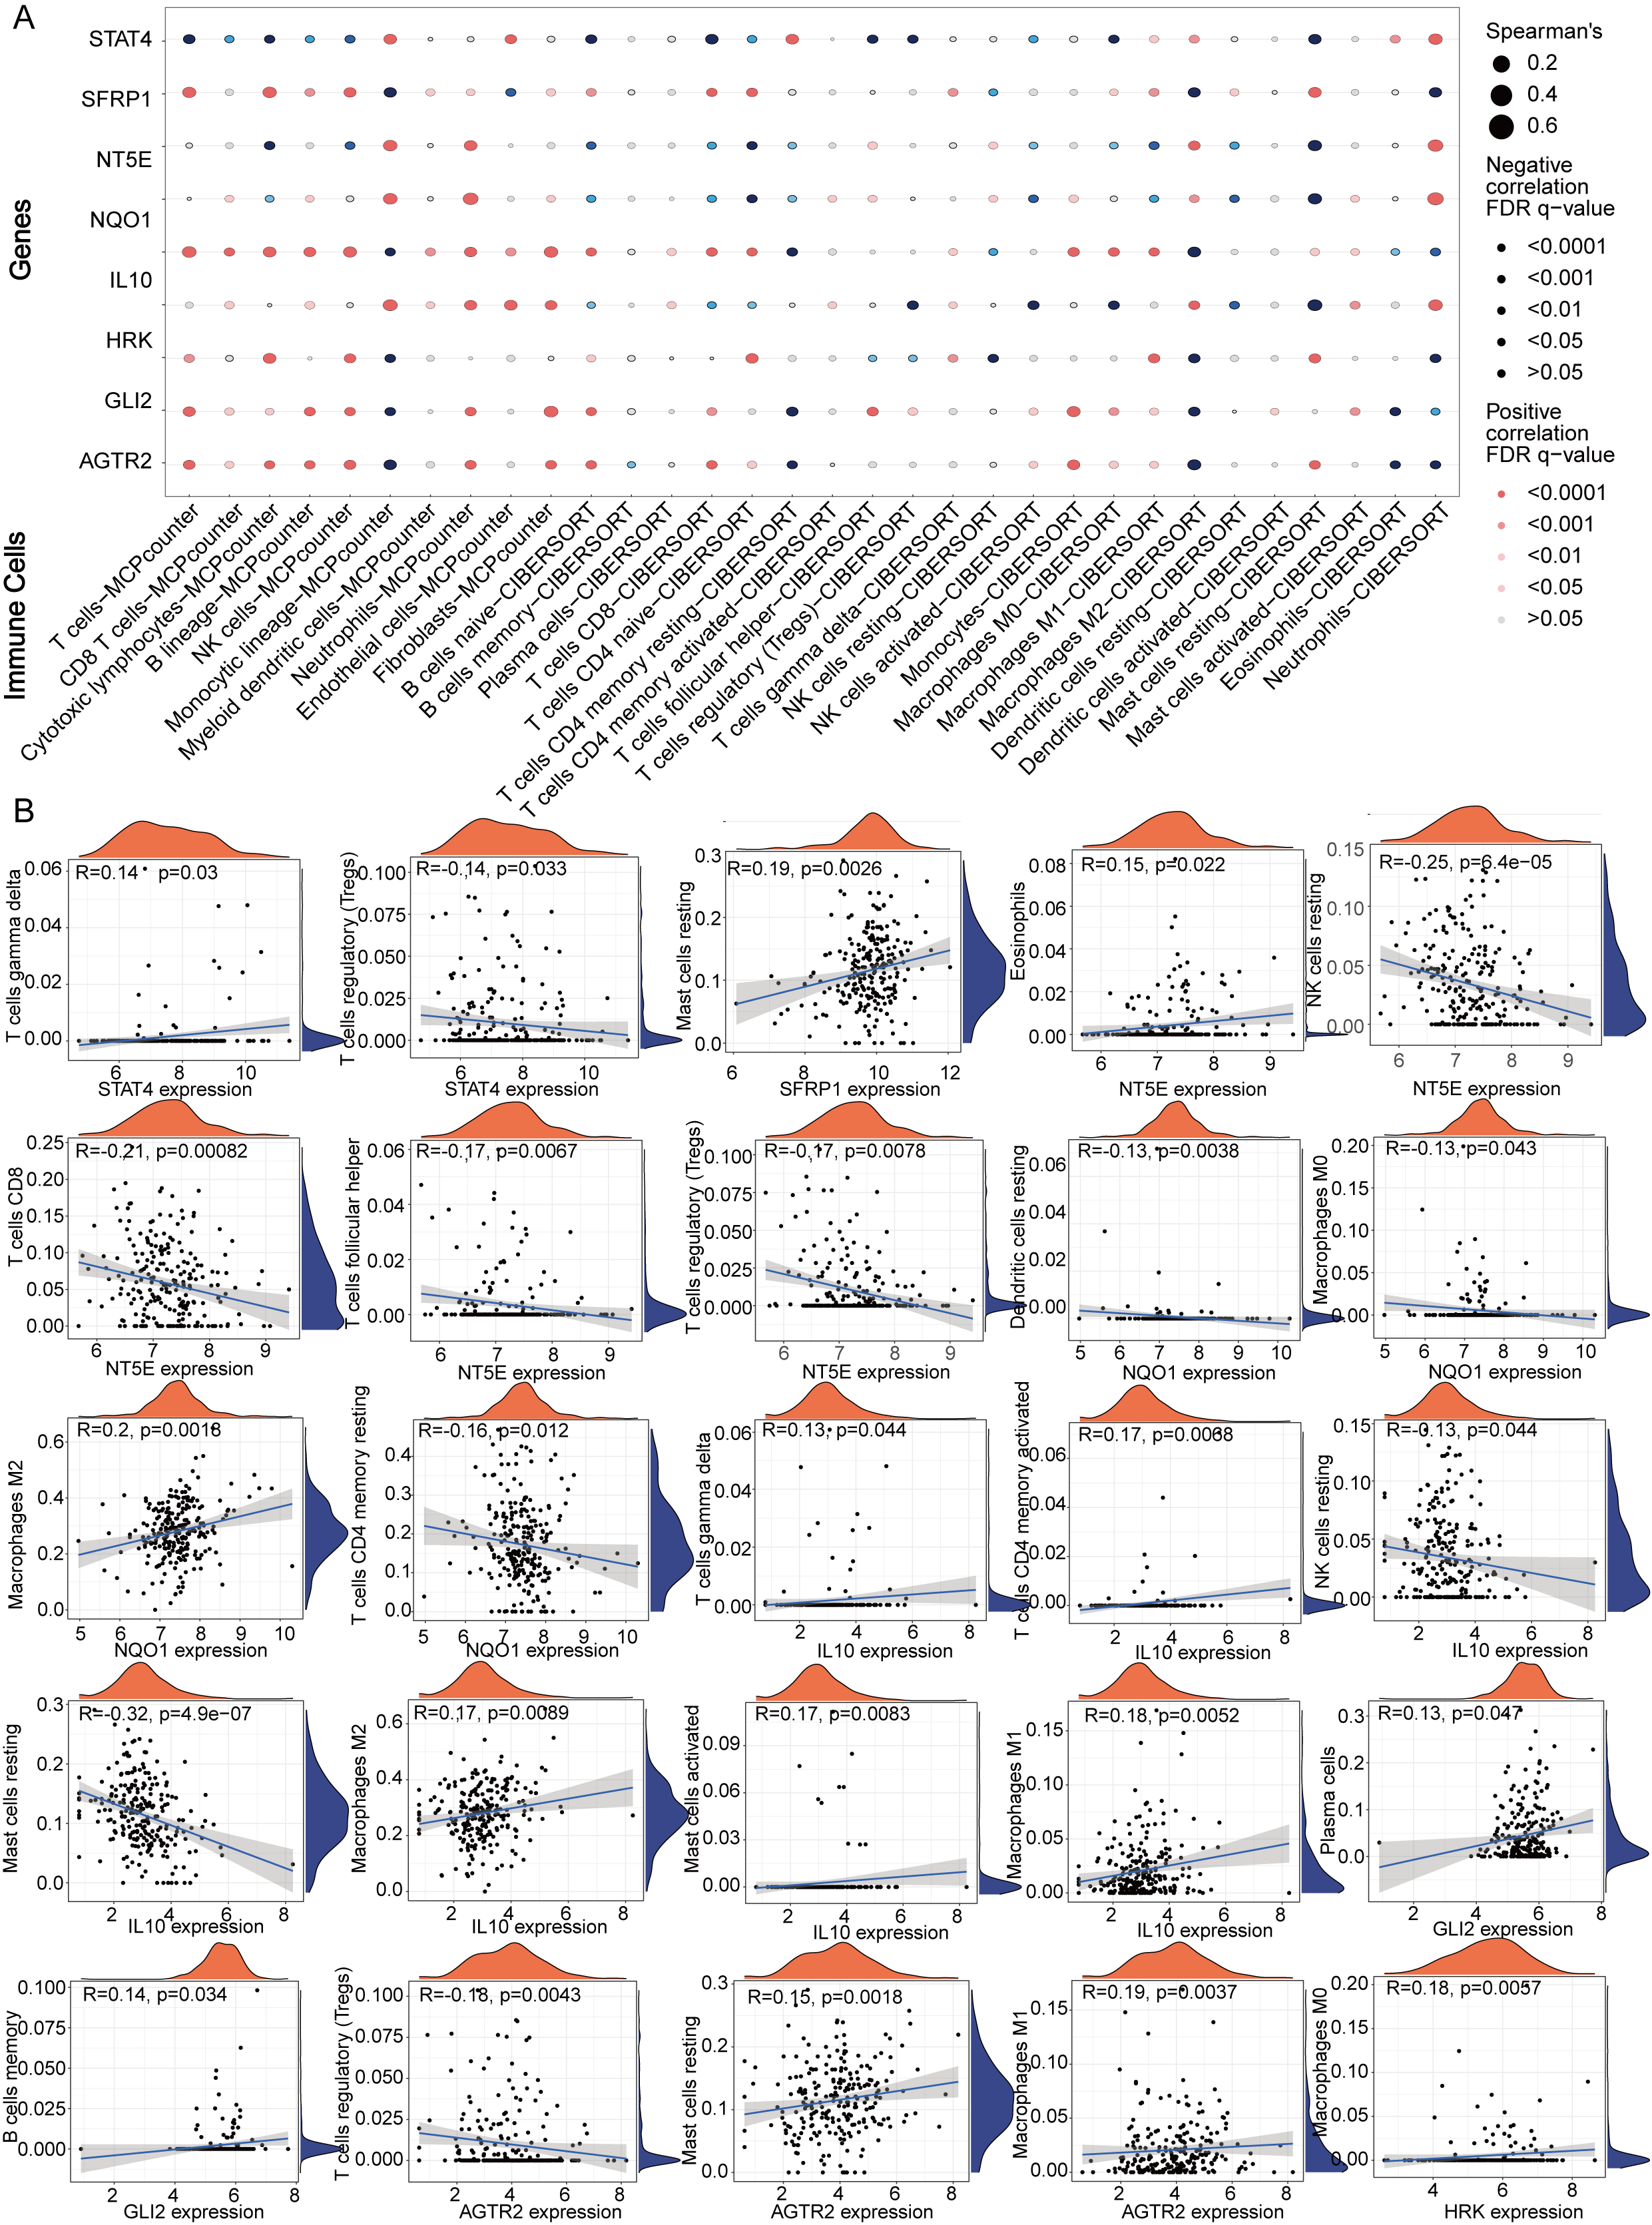
**

**Supplementary Figure 1. Association Between Core Programmed Cell Death Genes and Immune Cell Infiltration**

(A) Spearman correlation dot plot between eight core programmed cell death genes (STAT4, SFRP1, NT5E, NQO1, IL10, HRK, GLI2, AGTR2) and multiple immune cell types. Dot color represents correlation direction (red for positive, blue for negative), and dot size reflects statistical significance (FDR-adjusted p-value). (B) Representative Spearman scatter plots depicting the expression correlation between selected genes and immune cell subsets, with marginal density curves and regression line significance shown.


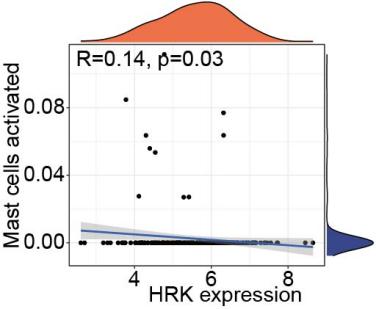


**Supplementary Figure 2. Negative Correlation Analysis Between HRK Gene and Mast Cell Activation**

**
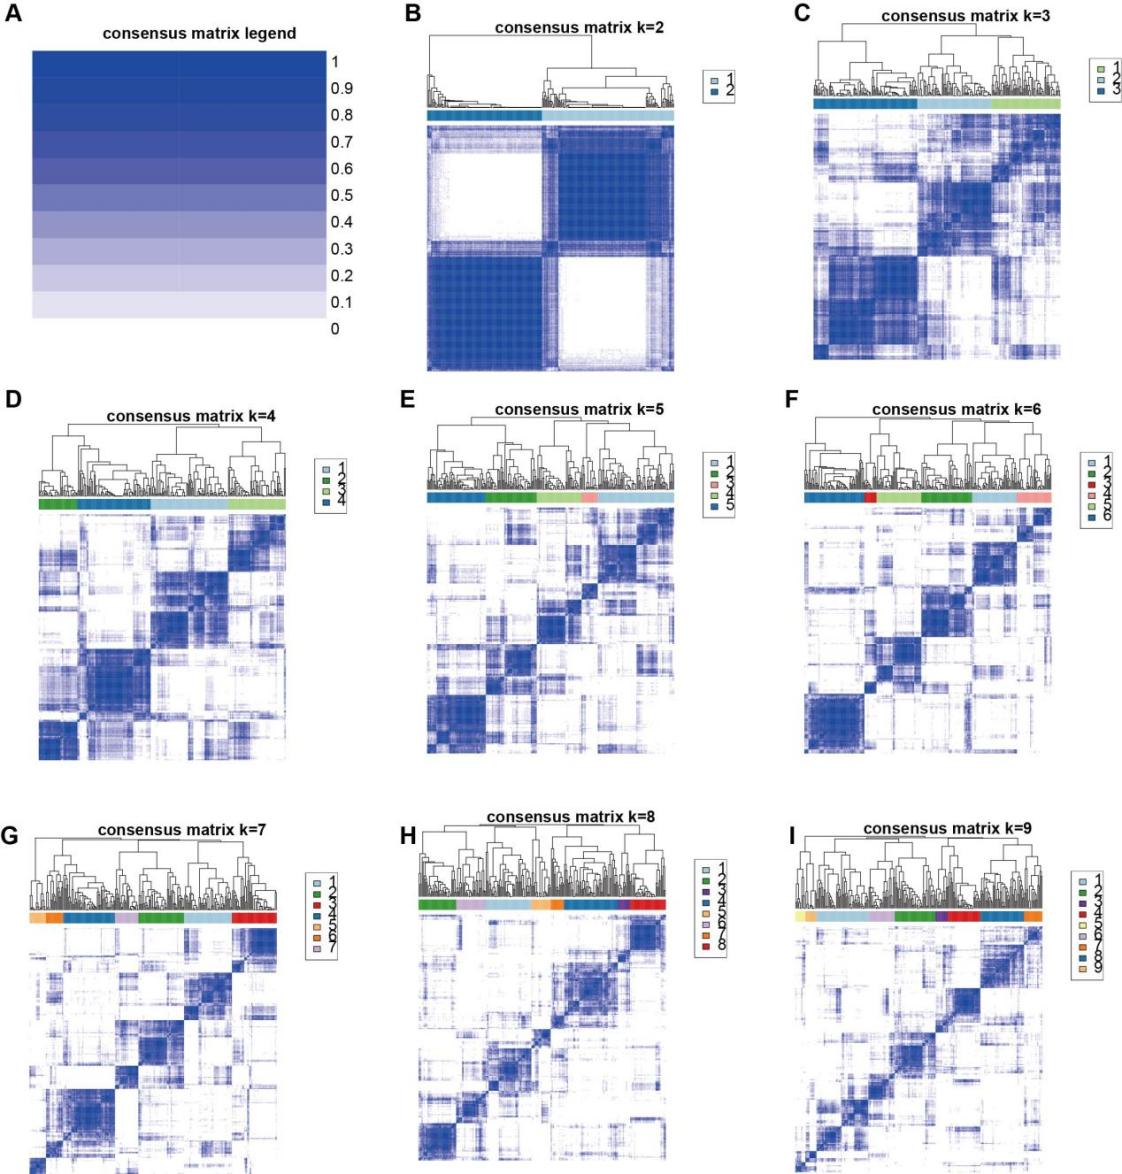
**

**Supplementary Figure 3. Consensus Clustering Process and Visualization Under Different k Values.** (A) Legend for consensus matrix plots; (B-I) Consensus matrices for clustering numbers k = 2 to 9.

**
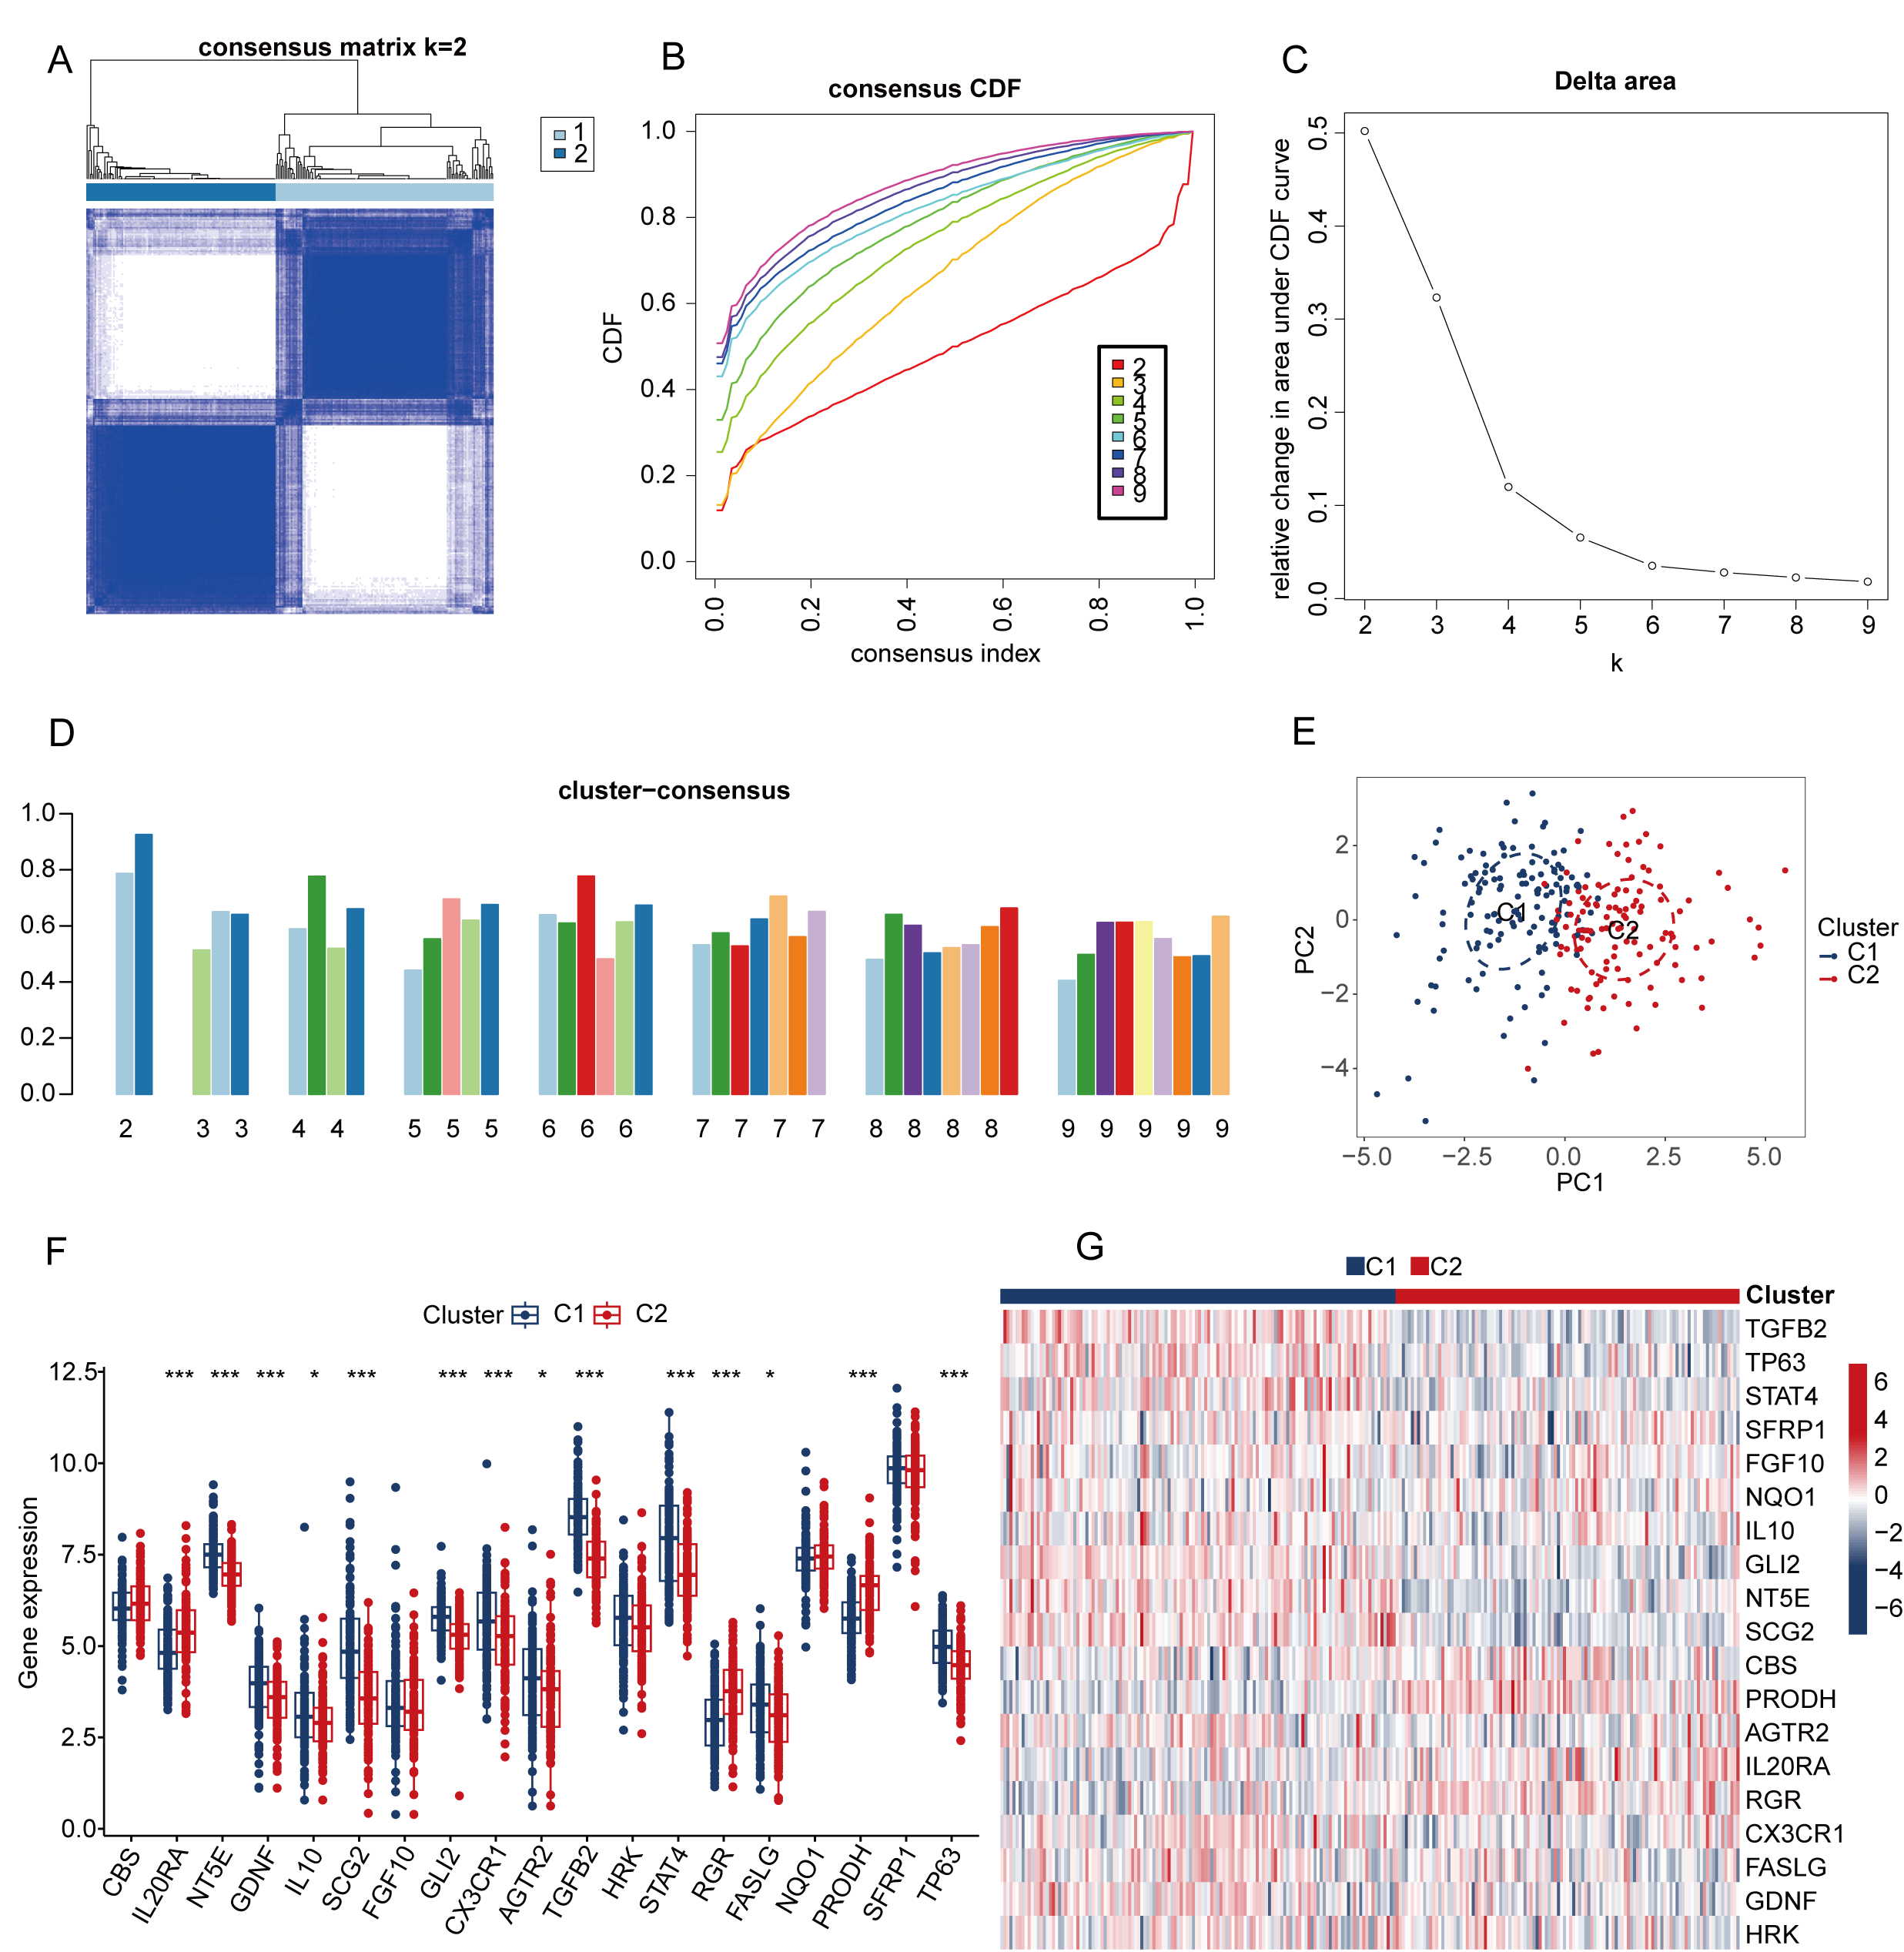
Supplementary Figure 4. Consensus Clustering Reveals Molecular Subtypes of Dilated Cardiomyopathy and Differential Expression of Signature Genes**

(A) Consensus clustering matrix showing stable classification of samples into two subtypes (C1 and C2) when k=2. (B) Cumulative distribution function (CDF) curves showing consensus distributions for different values of k. (C) Delta area plot showing relative change in the area under the CDF curve. (D) Consensus score plot under the same k value. (E) Principal component analysis (PCA) scatter plot illustrating sample distribution along PC1 and PC2 dimensions. (F) Boxplots showing the expression differences of key genes between C1 and C2 subtypes. (G) Heatmap of differentially expressed genes between the two subtypes, C1 and C2. All data are presented as mean±SEM. *p < 0.05; ***p < 0.001.


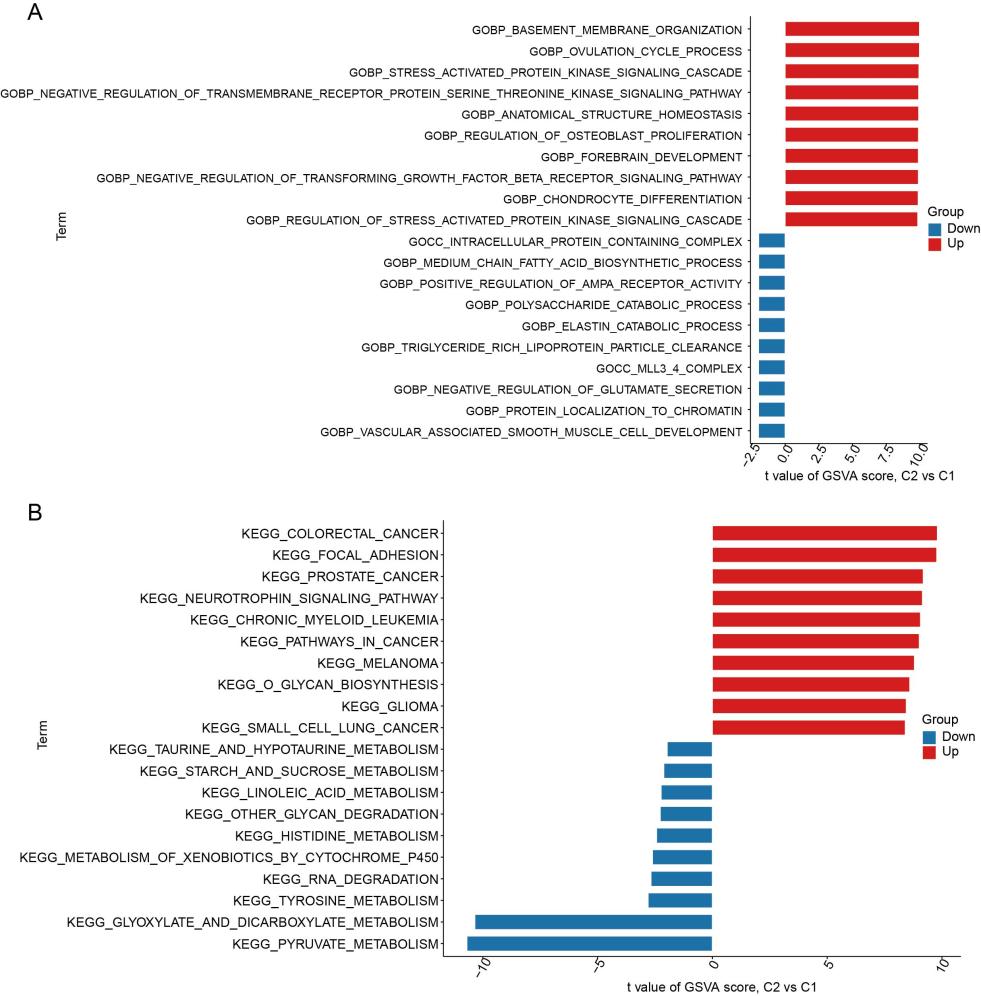


**Supplementary Figure 5. GSVA Enrichment Analysis of Functional Pathway Differences Between Molecular Subtypes.** (A) Differential analysis of GO biological processes (GOBP and GOCC); blue indicates significant downregulation in C2, red indicates upregulation. (B) GSVA enrichment of KEGG pathways showing differences in C2 compared to C1.


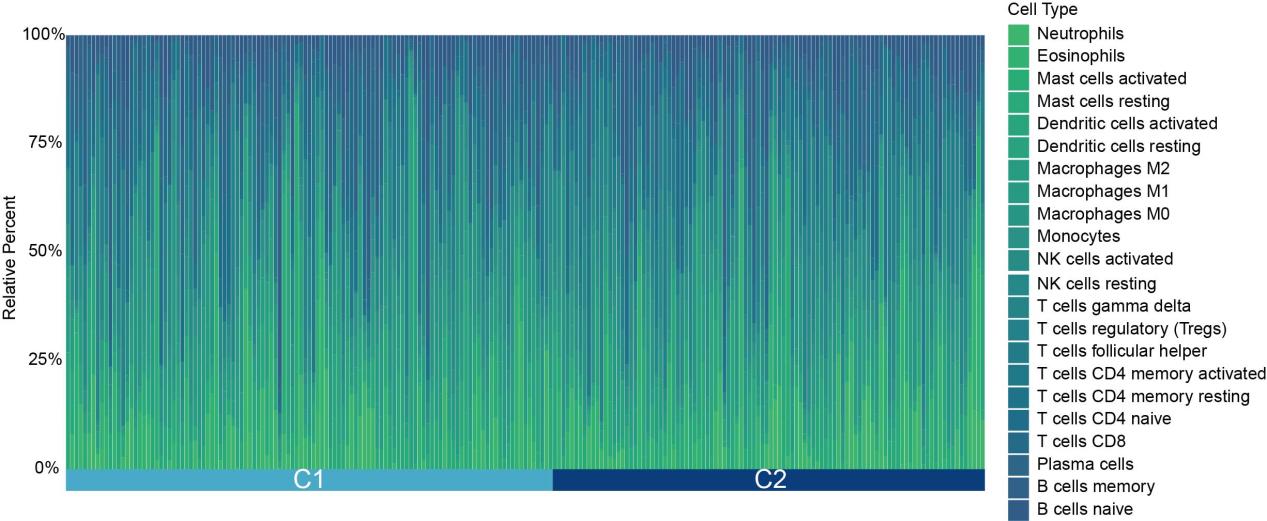


**Supplementary Figure 6. Immune Infiltration Characteristics of C1 and C2 Molecular Subtypes.** CIBERSORT analysis shows the distribution of immune cell infiltration proportions across subtypes. The y-axis of the bar plot represents relative abundance of immune cells, the x-axis corresponds to sample IDs, with subtype annotations (C1 and C2) indicated below.


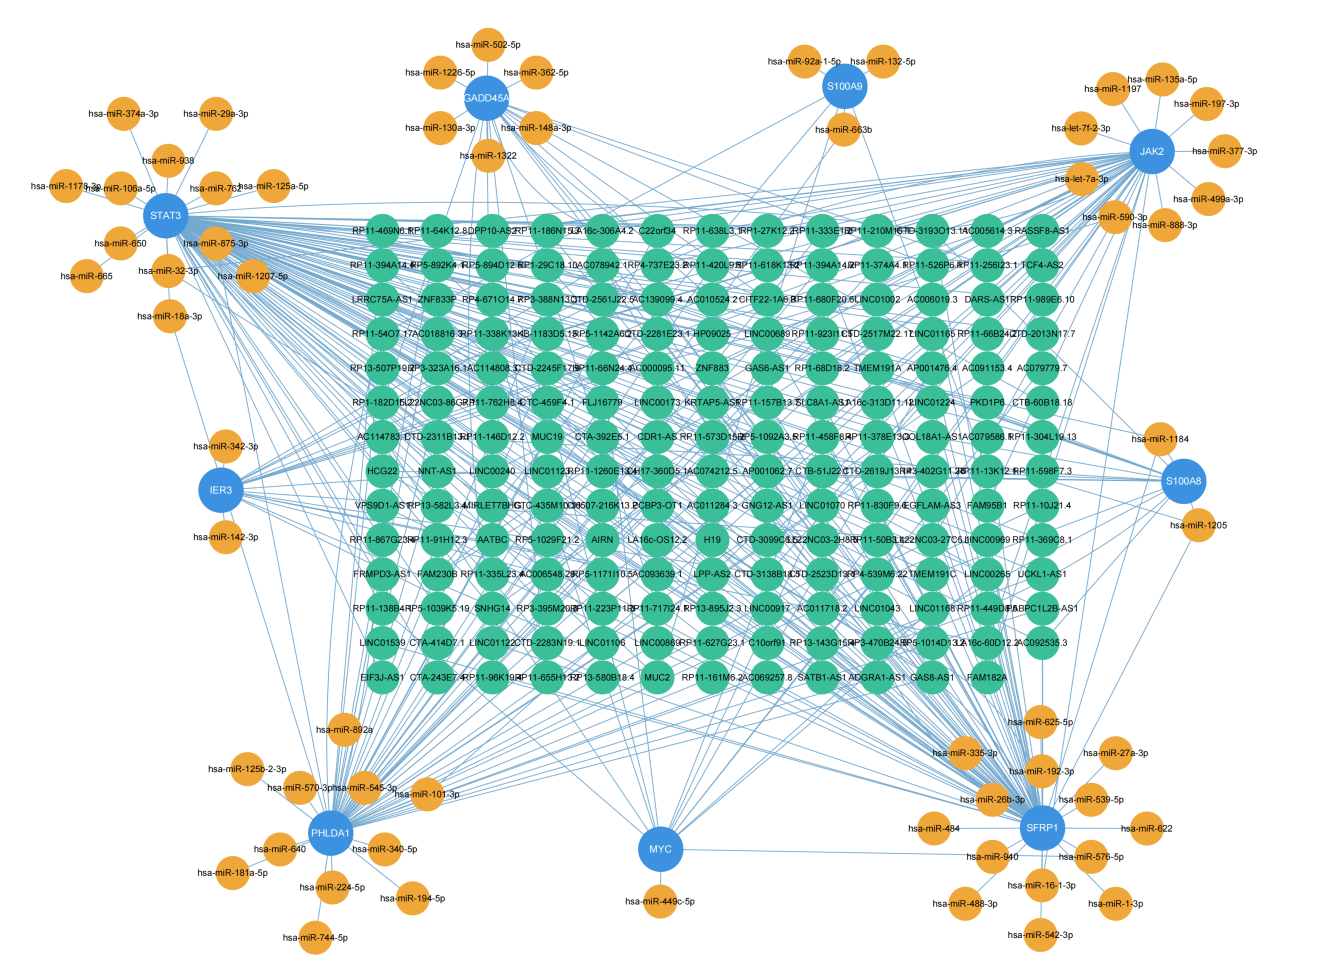


**Supplementary Figure 7. ceRNA Regulatory Network Constructed Based on Core Genes.** Regulatory relationships among core genes, differentially expressed miRNAs, and candidate lncRNAs. Blue nodes represent core mRNAs (e.g., STAT3, MYC, JAK2), orange nodes indicate regulatory miRNAs, and green nodes denote lncRNAs potentially involved in ceRNA interactions. Edges represent regulatory directions. Several hub genes occupy central positions, suggesting their involvement in DCM pathogenesis through miRNA–lncRNA networks.


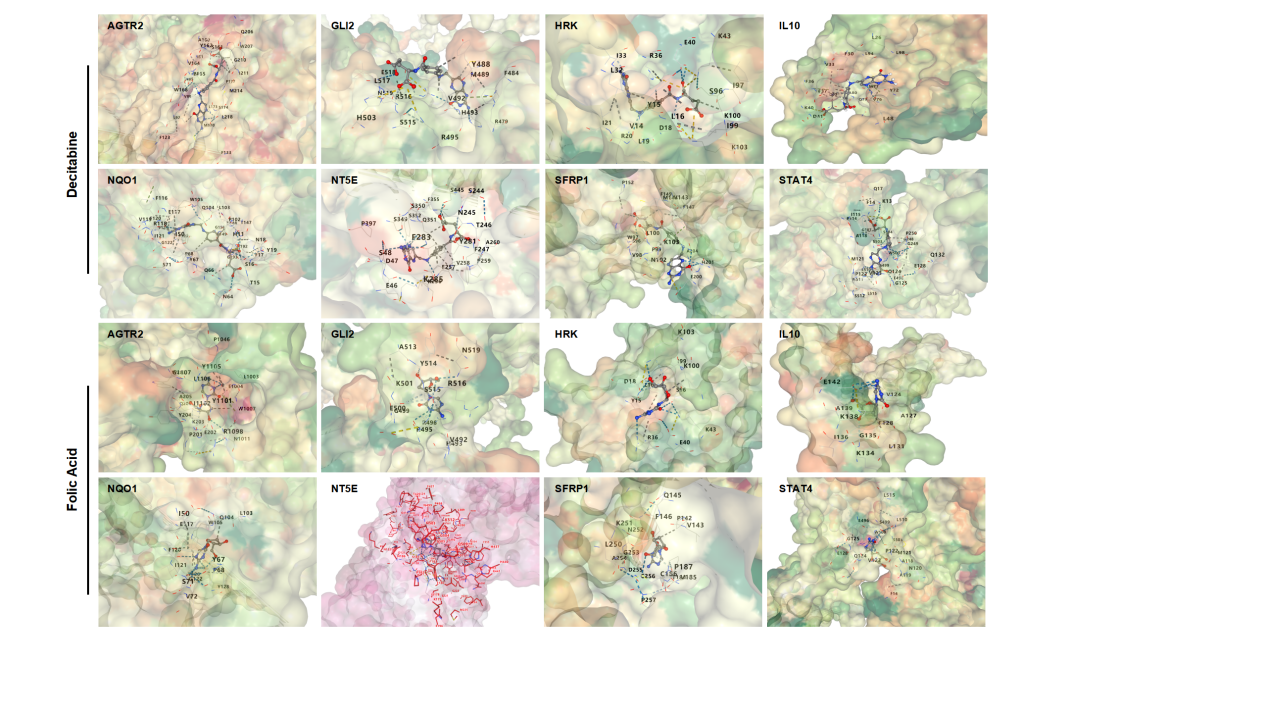


**Supplementary Figure 8. Drug Target Prediction and Molecular Docking Validation.** 3D binding conformations of candidate drugs Decitabine and Folic Acid with core target proteins. Docking models illustrate interactions between drugs and proteins such as AGTR2, GLI2, HRK, IL10, NT5E, NQO1, SFRP1, and STAT4, highlighting key hydrogen-bonding residues and hydrophobic interaction sites.


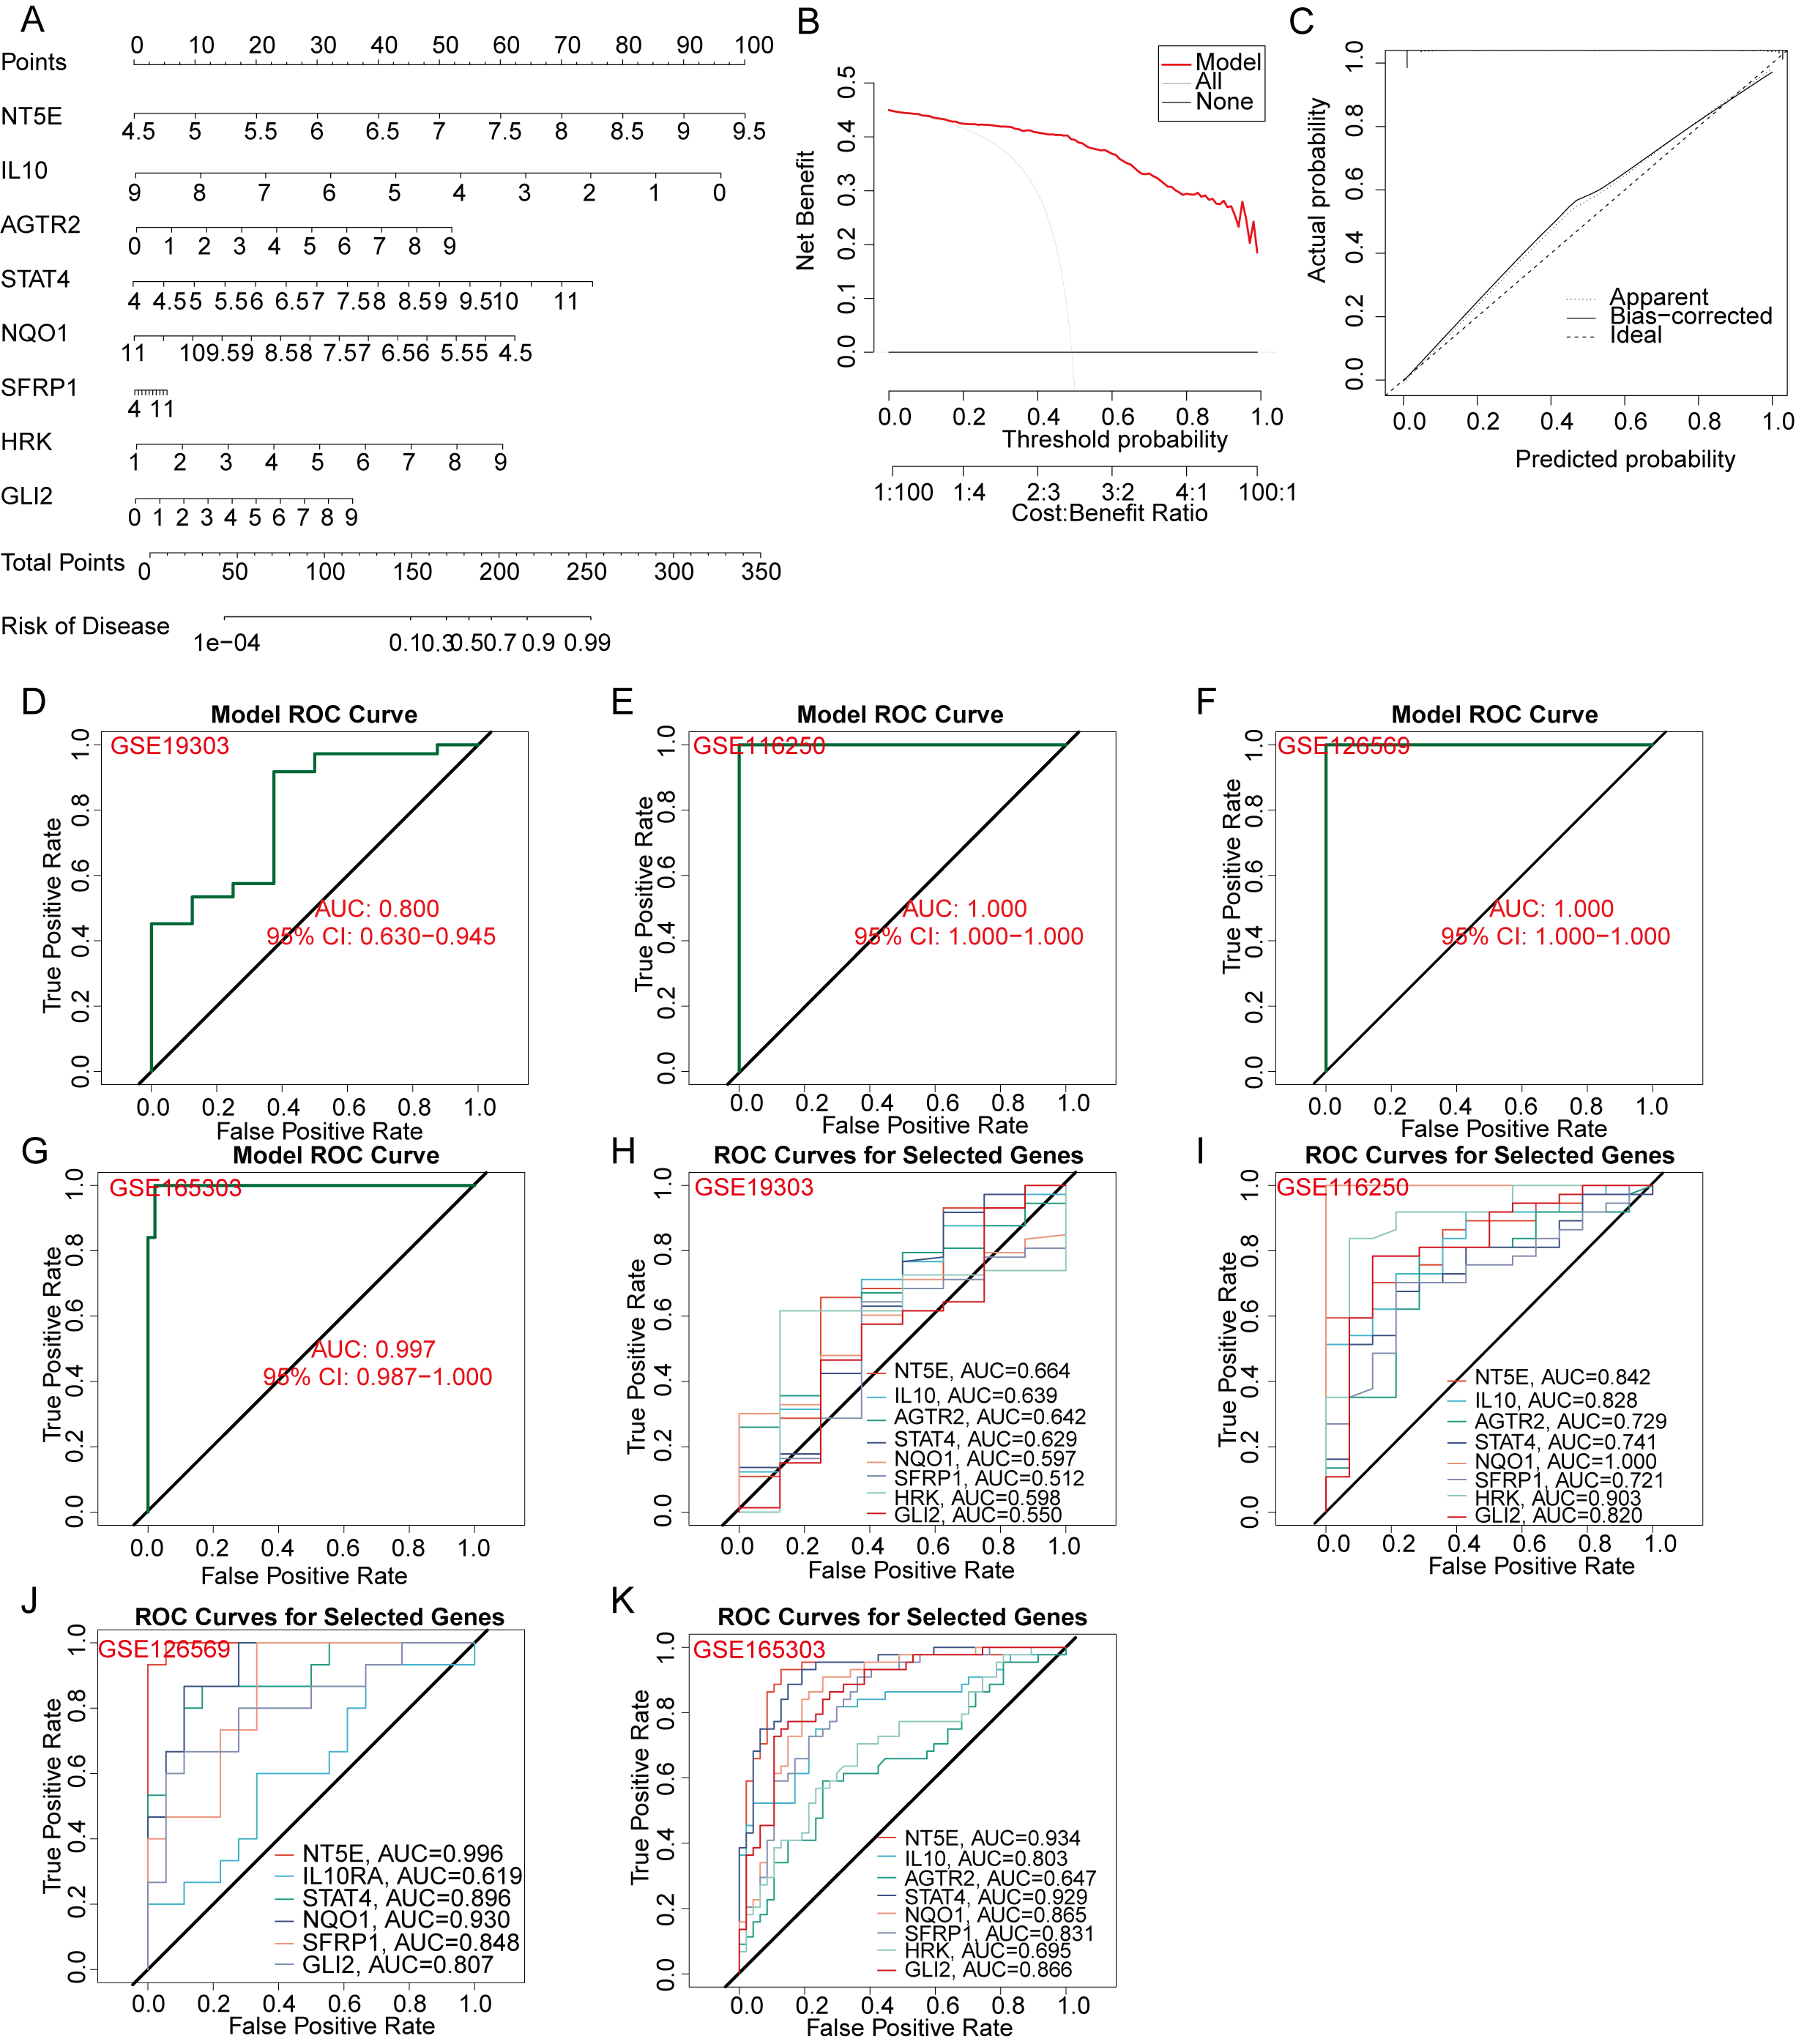


**Supplementary Figure 9. Risk Prediction Model Based on Core Signature Genes and Performance Validation**

(A-C) Risk prediction nomogram based on eight feature genes (NT5E, IL10, AGTR2, STAT4, NQO1, SFRP1, HRK, GLI2) (A), decision curve analysis (B), and calibration curve (C). (D-F, J) Receiver operating characteristic (ROC) curve validation in external datasets: GSE19303 (D), GSE116250 (E), GSE126569 (F), and GSE165303 (J). (G-I, K) ROC curve analysis of the individual predictive performance of each of the eight genes in GSE19303 (G), GSE116250 (H), GSE126569 (I), and GSE165303 (K).


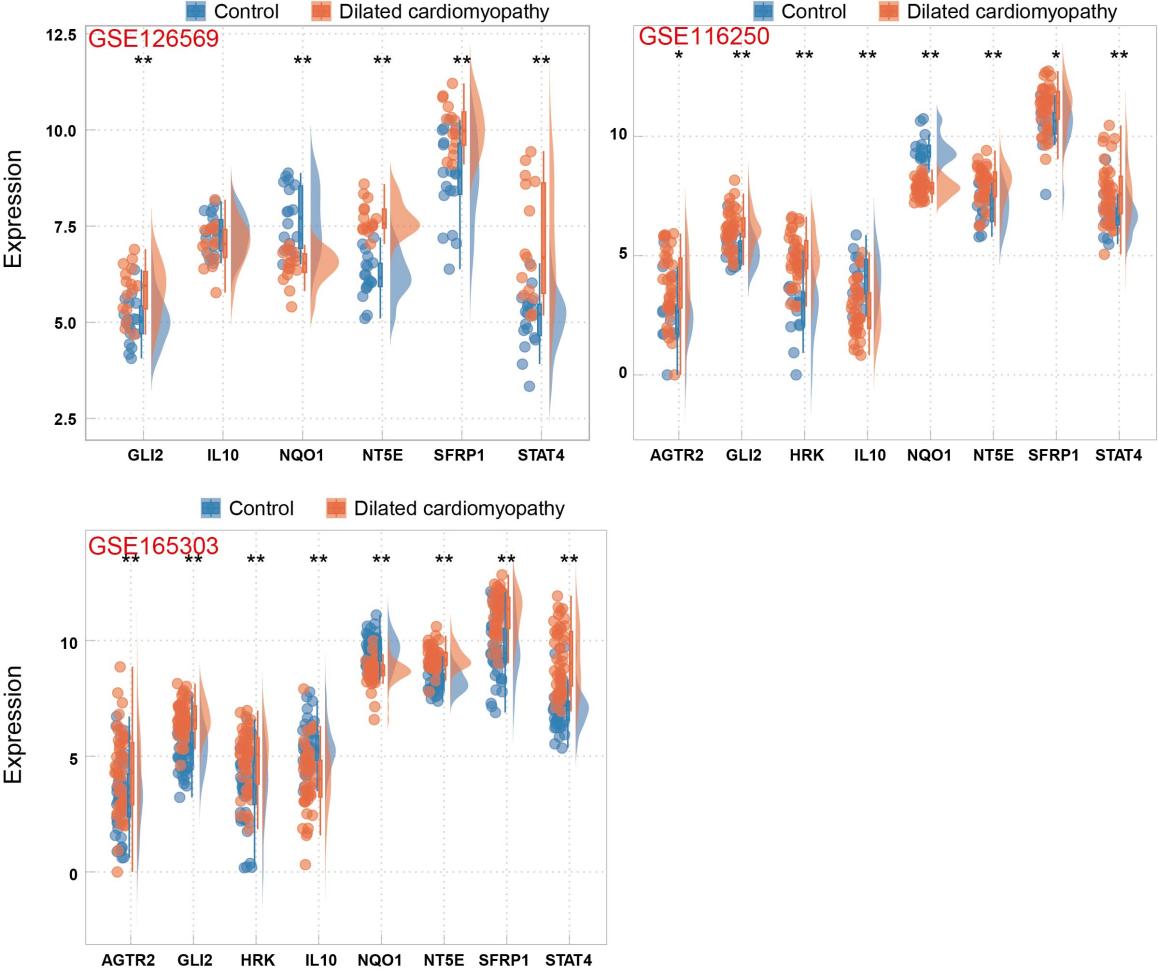


**Supplementary Figure 10.** Differential Expression Analysis of Core Signature Genes Between DCM and Control Groups Across Multiple Independent Datasets. Expression distributions of eight core genes in DCM (orange) vs. control (blue) groups from GSE126569, GSE116250, and GSE165303 datasets.

**2. Supplementary Tables**

**Supplementary Table 1. Detailed GSE data for each group**

| GEO ID | Platform | Samples | Number of Controls | Number of Cases | Country | Year | Author |
| --- | --- | --- | --- | --- | --- | --- | --- |
| Training set | | | | | | | |
| GSE141910 | GPL16791 | 322 | 161 | 161 | USA | 2019 | Michael Patrick Morley |
| GSE57338 | GPL11532 | 231 | 136 | 95 | USA | 2014 | Michael Patrick Morley |
| Validation set | | | | | | | |
| GSE19303 | GPL570 | 82 | 8 | 74 | Germany | 2019 | Sabine Ameling |
| GSE116250 | GPL16791 | 53 | 15 | 38 | USA | 2020 | Mary E Sweet |
| GSE165303 | GPL18573 and GPL20795 | 93 | 48 | 45 | France | 2022 | Lei Jiang |
| GSE126569 | GPL16791 and GPL20301 | 36 | 18 | 18 | USA | 2023 | Axel Visel |
| Single cell |  |  |  |  |  |  |  |
| GSE183852 | GPL24676 | 7 | 2 | 5 | USA | 2022 | Kory Lavine |

**Supplementary Table 2. Classification of cell death types**

| **Disulfidptosis** | **Apoptosis** | **Pyroptosis** | **Ferroptosis** | **Autophagy** | **Necroptosis** | **Cuproptosis** | **Parthanatos** | **Entoticcelldeath** | **Netoticcelldeath** | **Lysosome-dependentcelldeath** | **Alkaliptosis** | **Oxeiptosis** | **NETosis** | **Immunogenic_cell_death** | **Anoikis** | **Paraptosis** | **Methuosis** | **Entosis** |
| --- | --- | --- | --- | --- | --- | --- | --- | --- | --- | --- | --- | --- | --- | --- | --- | --- | --- | --- |
| SLC7A11 | AATF | BAK1 | ABCC1 | ABL1 | GLUD1 | NFE2L2 | PARP | AMPK | ELANE | ABCA2 | IKBKB | PGAM5 | MYD88 | ATG5 | BRMS1 | CAMK2B | CSNK2A1 | AR |
| GYS1 | ABL1 | BAX | ACACA | ABL2 | GLUD2 | NLRP3 | MIF | ATG5 | MMP1 | ABCB9 | NFKB1 | KEAP1 | TLR2 | BAX | PTK2 | PRKACG | RAC1 | TP53 |
| NDUFS1 | ACAA2 | CASP1 | ACO1 | ACER2 | ALOX15 | ATP7B | AIFM1 | ATG7 | MPO | ACP2 | CA9 | AIFM1 | PAD4 | CALR | NTRK2 | MARK4 | ARF6 | ROCK1 |
| NDUFA11 | ACKR3 | CASP3 | ACSF2 | ADRA1A | FTH1 | ATP7A | HSP70 | BECN1 | CAMP | ACP5 | CHUK | NRF2 | PRKCA | CASP1 | BCL2L11 | SSTR5 | GIT1 | PCK2 |
| NUBPL | ACVR1 | CASP4 | ACSL1 | ADRB2 | PYG | SLC31A1 | PAAN | CDC42 | PADI4 | ADGRE2 | IKBKG | AIRE | PKCB | CASP8 | SRC | TAAR5 | MTOR | TNFSF10 |
| NCKAP1 | ACVR1B | CASP5 | ACSL3 | AKT1 | CAPN1 | FDX1 | ARH3 | CDH1 | EIPA | AGA | NFKB1A |  | PRKCZ | CD4 | CEACAM6 | USP10 | MET | MTUS2 |
| LRPPRC | ADORA1 | CASP6 | ACSL4 | AMBRA1 | CASP1 | LIAS | RNF146 | CTNNA1 | NCX1 | AP1B1 | RELA |  | NOX3 | CD8A | CAV1 | PRKAG3 | PFKFB3 | AURKA |
| SLC3A2 | AEN | CASP8 | ACSL5 | ATF6 | GLNA | LIPT1 | ADPRHL2 | CYBB | MIA | AP1G1 |  |  | NOX4 | CD8B | AKT1 | HACD2 | MIR199A1 | KIF2C |
| RPN1 | AGT | CASP9 | ACSL6 | ATG101 | BAX | LIPT2 | OGG1 | MYH14 |  | AP1M1 |  |  | NOX1 | CXCR3 | ITGB1 | NT5C |  | RHOA |
| ACTN4 | AGTR2 | CHMP2A | AIFM2 | ATG13 | BCL2 | DLD |  | PI3KC3 |  | AP1M2 |  |  | CTSG | EIF2AK3 | CEACAM5 | INSRR |  | MTOR |
| ACTB | AIFM1 | CHMP2B | AKR1C1 | ATG14 | FADD | DLAT |  | RHOA |  | AP1S1 |  |  | PRTN3 | ENTPD1 | EGFR | SSTR3 |  | EZR |
| CD2AP | AKT1 | CHMP3 | AKR1C2 | ATG2A | RIPK1 | PDHA1 |  | RNF146 |  | AP1S2 |  |  | ELANE | FOXP3 | BCL2 | TAAR9 |  | GZMB |
| CAPZB | ANXA6 | CHMP4A | AKR1C3 | ATG2B | TNF | PDHB |  | ROCK |  | AP1S3 |  |  | MPO | HMGB1 | CASP8 | HSPB8 |  | MRTFA |
| DSTN | APAF1 | CHMP4B | ALOX12 | ATG5 | TNFRSF1A | MTF1 |  | RUBCN |  | AP3B1 |  |  | GSDMD | HSP90AA1 | SIK1 | PLPP2 |  | PTK2 |
| FLNA | APPL1 | CHMP4C | ALOX15 | ATG7 | TRADD | GLS |  | UVRAG |  | AP3B2 |  |  | IL1B | IFNA1 | PTRH2 | G6PC2 |  | DIAPH1 |
| FLNB | AR | CHMP6 | ALOX5 | ATM | TRAF2 | CDKN2A |  |  |  | AP3D1 |  |  | CXCL1 | IFNB1 | STAT3 | GUCY2EP |  | LPAR2 |
| INF2 | ARHGEF2 | CHMP7 | ATG5 | ATP13A2 | PPIA | DBT |  |  |  | AP3M1 |  |  | PLA2G7 | IFNG | TLE1 | CDK4 |  | MAP1LC3A |
| IQGAP1 | ARL6IP5 | CYCS | ATG7 | ATP6V0A1 | CAPN2 | GCSH |  |  |  | AP3M2 |  |  | CXCL8 | IFNGR1 | DAPK2 | RGR |  | PIKFYVE |
| MYH10 | ARMC10 | ELANE | ATP5MC3 | ATP6V0A2 | HSP90A | DLST |  |  |  | AP3S1 |  |  | CDK6 | IL10 | CTNNB1 | ADGRG1 |  | CTTN |
| MYL6 | ARRB2 | GPX4 | BACH1 | ATP6V0B | IL1A |  |  |  |  | AP3S2 |  |  | HMGB1 | IL17A | ZNF304 | UQCRC1 |  | MCOLN1 |
| MYH9 | ASAH2 | GSDMB | CARS | ATP6V0C | TNFSF6 |  |  |  |  | AP4B1 |  |  | MMP9 | IL17RA | MAPK1 | TNK2 |  | FOXO1 |
| PDLIM1 | ATF3 | GSDMC | CBS | ATP6V0D1 | TNFRSF6 |  |  |  |  | AP4E1 |  |  | AGER | IL1B | BMF | RNF181 |  | CTNNA1 |
| TLN1 | ATF4 | GSDMD | CD44 | ATP6V0D2 | CASP8 |  |  |  |  | AP4M1 |  |  | CSF3 | IL1R1 | ITGA5 | MKNK2 |  | CXCL8 |
| OXSM | ATM | GSDME | CHAC1 | ATP6V0E1 | JNK |  |  |  |  | AP4S1 |  |  | TGFB1 | IL6 | TP53 | UBE2U |  |  |
|  | ATP2A1 | GZMB | CISD1 | ATP6V0E2 | JAK2 |  |  |  |  | ARF1 |  |  |  | LY96 | MCL1 | MYLK |  |  |
|  | ATP2A3 | HMGB1 | CP | ATP6V1A | CAMK2 |  |  |  |  | ARL8B |  |  |  | MYD88 | BCL2L1 | CTDSP2 |  |  |
|  | ATP5IF1 | IL18 | CRYAB | ATP6V1B1 | IL1B |  |  |  |  | ARSA |  |  |  | NLRP3 | CASP3 | LCK |  |  |
|  | AVP | IL1A | CS | ATP6V1B2 | IFNG |  |  |  |  | ARSB |  |  |  | NT5E | CDH1 | GPR15 |  |  |
|  | BAD | IL1B | CYBB | ATP6V1C1 | STAT3 |  |  |  |  | ARSG |  |  |  | P2RX7 | BAD | ATP23 |  |  |
|  | BAG3 | IRF1 | DPP4 | ATP6V1C2 | IRF9 |  |  |  |  | ASAH1 |  |  |  | PDIA3 | PIK3CA | LPAR1 |  |  |
|  | BAG5 | IRF2 | EMC2 | ATP6V1D | TNFSF10 |  |  |  |  | ATP10B |  |  |  | PIK3CA | PAK1 | PI4KB |  |  |
|  | BAG6 | NLRC4 | FADS2 | ATP6V1E1 | TNFRSF10A |  |  |  |  | ATP13A2 |  |  |  | PRF1 | ITGAV | DSTYK |  |  |
|  | BAK1 | NLRP1 | FANCD2 | ATP6V1E2 | TNFRSF10B |  |  |  |  | ATP6AP1 |  |  |  | TLR4 | FN1 | CFD |  |  |
|  | BAX | NLRP2 | FDFT1 | ATP6V1G1 | CFLAR |  |  |  |  | ATP6V0A1 |  |  |  | TNF | MAPK3 | PPP3CA |  |  |
|  | BBC3 | NLRP3 | FTH1 | ATP6V1G2 | XIAP |  |  |  |  | ATP6V0A2 |  |  |  |  | PTGS2 | CCR4 |  |  |
|  | BCAP31 | NLRP6 | FTL | ATP6V1H | BID |  |  |  |  | ATP6V0A4 |  |  |  |  | BAX | PRAG1 |  |  |
|  | BCL10 | NLRP7 | FTMT | AUP1 | AIFM1 |  |  |  |  | ATP6V0B |  |  |  |  | BCAR1 | CDKN3 |  |  |
|  | BCL2 | NOD1 | G6PD | BAD | TRPM7 |  |  |  |  | ATP6V0C |  |  |  |  | PTEN | GPR153 |  |  |
|  | BCL2A1 | PLCG1 | GCLC | BAG3 | IFNAR1 |  |  |  |  | ATP6V0D1 |  |  |  |  | ERBB2 | DDIT3 |  |  |
|  | BCL2L1 | PJVK | GCLM | BCL2 | IFNAR2 |  |  |  |  | ATP6V0D2 |  |  |  |  | ANGPTL4 | MAPK8 |  |  |
|  | BCL2L10 | PRKACA | GLS2 | BCL2L11 | IFNGR1 |  |  |  |  | ATP6V1H |  |  |  |  | PDK4 | MAP2K2 |  |  |
|  | BCL2L11 | PYCARD | GOT1 | BECN1 | IFNGR2 |  |  |  |  | BLK |  |  |  |  | CYCS | MAPK1 |  |  |
|  | BCL2L12 | SCAF11 | GPX4 | BMF | TLR3 |  |  |  |  | BLOC1S1 |  |  |  |  | BRAF | MAPK14 |  |  |
|  | BCL2L14 | TINAP | GSS | BNIP3 | TIRP |  |  |  |  | BLOC1S2 |  |  |  |  | YAP1 | IGF1R |  |  |
|  | BCL2L2 | TNF | HMGCR | BNIP3L | IFNA |  |  |  |  | BORCS5 |  |  |  |  | ANKRD13C | PDCD6IP |  |  |
|  | BCL3 | TP53 | HMOX1 | BOK | IFNB |  |  |  |  | BORCS6 |  |  |  |  | ITGA2 | CASP9 |  |  |
|  | BCLAF1 | TP63 | HSBP1 | C9orf72 | TRIF |  |  |  |  | BTK |  |  |  |  | ANXA5 | ERN1 |  |  |
|  | BDKRB2 | AIM2 | HSPB1 | CALCOCO2 | VDAC1 |  |  |  |  | C12orf4 |  |  |  |  | BIRC5 | ATF6 |  |  |
|  | BDNF | GSDMA | IREB2 | CAMKK2 | SLC25A4S |  |  |  |  | CBL |  |  |  |  | MTOR | XBP1 |  |  |
|  | BECN1 | IL6 | KEAP1 | CAPN1 | PPID |  |  |  |  | CD164 |  |  |  |  | TIMP1 | AKT1 |  |  |
|  | BID | NOD2 | LPCAT3 | CAPNS1 | CYLD |  |  |  |  | CD300A |  |  |  |  | BDNF | EIF2S1 |  |  |
|  | BIK | TIRAP | MAP1LC3A | CASP1 | RIPK3 |  |  |  |  | CD63 |  |  |  |  | CSPG4 | HSPA5 |  |  |
|  | BIRC6 |  | MAP1LC3B | CASP3 | MLKL |  |  |  |  | CD68 |  |  |  |  | BSG | CASP4 |  |  |
|  | BLOC1S2 |  | MAP1LC3C | CDC37 | TRAF5 |  |  |  |  | CD84 |  |  |  |  | AKT2 | CASP3 |  |  |
|  | BMF |  | MT1G | CDK5 | TLR4 |  |  |  |  | CHGA |  |  |  |  | STK11 | CASP7 |  |  |
|  | BMP4 |  | NCOA4 | CDK5R1 | RBCK1 |  |  |  |  | CLN3 |  |  |  |  | IGF1 | ITPR3 |  |  |
|  | BMP5 |  | NFE2L2 | CHMP4A | HMGB1 |  |  |  |  | CLN5 |  |  |  |  | IGF1R | RYR1 |  |  |
|  | BMPR1B |  | NFS1 | CHMP4B | JAK1 |  |  |  |  | CLNK |  |  |  |  | ITGA6 | RYR2 |  |  |
|  | BNIP3 |  | NOX1 | CISD2 | JAK3 |  |  |  |  | CLTA |  |  |  |  | ILK | MCU |  |  |
|  | BNIP3L |  | NQO1 | CLEC16A | TYK2 |  |  |  |  | CLTB |  |  |  |  | CFLAR | TNFRSF19 |  |  |
|  | BOK |  | NRF2 | CLN3 | STAT1 |  |  |  |  | CLTC |  |  |  |  | RHOA | PDCD5 |  |  |
|  | BRCA1 |  | OTUB1 | CLU | STAT2 |  |  |  |  | CLTCL1 |  |  |  |  | HIF1A | CSF1 |  |  |
|  | BRCA2 |  | PCBP1 | CPTP | STAT4 |  |  |  |  | CLU |  |  |  |  | DAP3 | TP53 |  |  |
|  | BRSK2 |  | PCBP2 | CSNK2A2 | STAT5A |  |  |  |  | CPLX2 |  |  |  |  | MYBBP1A | NFKB1 |  |  |
|  | BTK |  | PEBP1 | CTSA | STAT5B |  |  |  |  | CTNS |  |  |  |  | TLE5 | PEBP1 |  |  |
|  | CAAP1 |  | PGD | CTTN | STAT6 |  |  |  |  | CTSA |  |  |  |  | ITGA3 | PHB |  |  |
|  | CASP1 |  | PHKG2 | DAP | H2A |  |  |  |  | CTSB |  |  |  |  | PTK2B |  |  |  |
|  | CASP10 |  | PRNP | DAPK1 | TNFAIP3 |  |  |  |  | CTSC |  |  |  |  | CCND1 |  |  |  |
|  | CASP12 |  | PROM2 | DAPK2 | RNF31 |  |  |  |  | CTSD |  |  |  |  | CTTN |  |  |  |
|  | CASP2 |  | PTGS2 | DAPK3 | CHMP2A |  |  |  |  | CTSE |  |  |  |  | CALR |  |  |  |
|  | CASP3 |  | RPL8 | DAPL1 | CHMP2B |  |  |  |  | CTSF |  |  |  |  | ATF4 |  |  |  |
|  | CASP4 |  | SAT1 | DCN | VPS24 |  |  |  |  | CTSG |  |  |  |  | CDCP1 |  |  |  |
|  | CASP5 |  | SAT2 | DDIT3 | CHMP4A |  |  |  |  | CTSH |  |  |  |  | PLAUR |  |  |  |
|  | CASP8 |  | SLC11A2 | DDRGK1 | CHMP4B |  |  |  |  | CTSK |  |  |  |  | SKP2 |  |  |  |
|  | CASP8AP2 |  | SLC1A5 | DEPDC5 | CHMP6 |  |  |  |  | CTSL |  |  |  |  | CHEK2 |  |  |  |
|  | CASP9 |  | SLC39A14 | DEPP1 | VPS4 |  |  |  |  | CTSO |  |  |  |  | HGF |  |  |  |
|  | CAV1 |  | SLC39A8 | DHRSX | CHMP1 |  |  |  |  | CTSS |  |  |  |  | E2F1 |  |  |  |
|  | CCAR2 |  | SLC3A2 | DNM1L | CHMP5 |  |  |  |  | CTSV |  |  |  |  | EGF |  |  |  |
|  | CCK |  | SLC40A1 | DRAM1 | SMPD1 |  |  |  |  | CTSW |  |  |  |  | PIK3CG |  |  |  |
|  | CD14 |  | SLC7A11 | DRAM2 | PYCARD |  |  |  |  | CTSZ |  |  |  |  | ITGB4 |  |  |  |
|  | CD24 |  | SQLE | EEF1A1 | NLRP3 |  |  |  |  | DEF8 |  |  |  |  | DAPK1 |  |  |  |
|  | CD27 |  | STEAP3 | EEF1A2 | ZBP1 |  |  |  |  | DNASE2 |  |  |  |  | MAPK8 |  |  |  |
|  | CD28 |  | TF | EIF2AK4 | IL33 |  |  |  |  | DNASE2B |  |  |  |  | PIK3R1 |  |  |  |
|  | CD38 |  | TFRC | EIF4G1 | FTL |  |  |  |  | ENTPD4 |  |  |  |  | PIK3R3 |  |  |  |
|  | CD3E |  | TP53 | EIF4G2 | SQSTM1 |  |  |  |  | FAM98A |  |  |  |  | MAP2K1 |  |  |  |
|  | CD44 |  | VDAC2 | ELAPOR1 | VDAC2 |  |  |  |  | FER |  |  |  |  | CXCL12 |  |  |  |
|  | CD5 |  | VDAC3 | EP300 | VDAC3 |  |  |  |  | FES |  |  |  |  | LGALS3 |  |  |  |
|  | CD70 |  | ZEB1 | EPM2A | CHMP7 |  |  |  |  | FGR |  |  |  |  | FBXW7-AS1 |  |  |  |
|  | CD74 |  |  | ERCC4 | PGAM5 |  |  |  |  | FLCN |  |  |  |  | BAK1 |  |  |  |
|  | CDIP1 |  |  | ERN1 | BIRC2 |  |  |  |  | FOXF1 |  |  |  |  | ABHD4 |  |  |  |
|  | CDKN1A |  |  | EXOC1 | BIRC3 |  |  |  |  | FTH1 |  |  |  |  | CD44 |  |  |  |
|  | CDKN2D |  |  | EXOC4 | EIF2AK2 |  |  |  |  | FTL |  |  |  |  | ITGA4 |  |  |  |
|  | CEBPB |  |  | EXOC7 | PLA2G4 |  |  |  |  | FUCA1 |  |  |  |  | FADD |  |  |  |
|  | CFLAR |  |  | EXOC8 | DNM1L |  |  |  |  | GAA |  |  |  |  | PHLDA2 |  |  |  |
|  | CHAC1 |  |  | FBXL2 | SPATA2 |  |  |  |  | GAB2 |  |  |  |  | TGFB1 |  |  |  |
|  | CHCHD10 |  |  | FBXO7 | FAF1 |  |  |  |  | GALC |  |  |  |  | HMCN1 |  |  |  |
|  | CHEK2 |  |  | FBXW7 | SHARPIN |  |  |  |  | GALNS |  |  |  |  | MMP2 |  |  |  |
|  | CIB1 |  |  | FEZ1 | NOX2 |  |  |  |  | GATA2 |  |  |  |  | CEBPB |  |  |  |
|  | CIDEB |  |  | FEZ2 | USP21 |  |  |  |  | GBA |  |  |  |  | CEMIP |  |  |  |
|  | CLU |  |  | FLCN | PARP1 |  |  |  |  | GCC2 |  |  |  |  | CDKN3 |  |  |  |
|  | COA8 |  |  | FOXK1 | CHMP4C |  |  |  |  | GGA1 |  |  |  |  | CBL |  |  |  |
|  | COL2A1 |  |  | FOXK2 |  |  |  |  |  | GGA2 |  |  |  |  | CASP9 |  |  |  |
|  | CRADD |  |  | FOXO1 |  |  |  |  |  | GGA3 |  |  |  |  | SFN |  |  |  |
|  | CREB3 |  |  | FOXO3 |  |  |  |  |  | GLA |  |  |  |  | MTDH |  |  |  |
|  | CREB3L1 |  |  | FTH1 |  |  |  |  |  | GLB1 |  |  |  |  | PRKCA |  |  |  |
|  | CRH |  |  | FTL |  |  |  |  |  | GM2A |  |  |  |  | TNFRSF10B |  |  |  |
|  | CRIP1 |  |  | FYCO1 |  |  |  |  |  | GNPTAB |  |  |  |  | CXCL8 |  |  |  |
|  | CSF2 |  |  | FZD5 |  |  |  |  |  | GNPTG |  |  |  |  | MIR200C |  |  |  |
|  | CSNK2A1 |  |  | GAPDH |  |  |  |  |  | GNS |  |  |  |  | AR |  |  |  |
|  | CSNK2A2 |  |  | GATA4 |  |  |  |  |  | GUSB |  |  |  |  | CDKN2A |  |  |  |
|  | CTH |  |  | GBA |  |  |  |  |  | HDAC6 |  |  |  |  | CPT1A |  |  |  |
|  | CTNNA1 |  |  | GFAP |  |  |  |  |  | HEXA |  |  |  |  | PIK3CB |  |  |  |
|  | CTSC |  |  | GNAI3 |  |  |  |  |  | HEXB |  |  |  |  | CLDN1 |  |  |  |
|  | CTTN |  |  | GOLGA2 |  |  |  |  |  | HGS |  |  |  |  | MIR204 |  |  |  |
|  | CUL1 |  |  | GPR137 |  |  |  |  |  | HGSNAT |  |  |  |  | MIR26A1 |  |  |  |
|  | CUL2 |  |  | GPR137B |  |  |  |  |  | HMOX1 |  |  |  |  | CDKN1A |  |  |  |
|  | CUL3 |  |  | GPSM1 |  |  |  |  |  | HPS6 |  |  |  |  | CDKN1B |  |  |  |
|  | CUL4A |  |  | GSK3A |  |  |  |  |  | HSPA8 |  |  |  |  | KLF12 |  |  |  |
|  | CUL5 |  |  | GSK3B |  |  |  |  |  | HYAL1 |  |  |  |  | NTRK1 |  |  |  |
|  | CX3CL1 |  |  | HAX1 |  |  |  |  |  | IDS |  |  |  |  | PLAU |  |  |  |
|  | CX3CR1 |  |  | HDAC6 |  |  |  |  |  | IDUA |  |  |  |  | MYC |  |  |  |
|  | CXCL12 |  |  | HERC1 |  |  |  |  |  | IGF2R |  |  |  |  | SMAD4 |  |  |  |
|  | CYLD |  |  | HGF |  |  |  |  |  | IL13 |  |  |  |  | PLK1 |  |  |  |
|  | CYP1B1 |  |  | HIF1A |  |  |  |  |  | IL13RA2 |  |  |  |  | MUC1 |  |  |  |
|  | DAB2IP |  |  | HMGB1 |  |  |  |  |  | IL4 |  |  |  |  | LGALS1 |  |  |  |
|  | DAP |  |  | HMOX1 |  |  |  |  |  | IL4R |  |  |  |  | PYCARD |  |  |  |
|  | DAP3 |  |  | HSP90AA1 |  |  |  |  |  | KIF1B |  |  |  |  | SESN2 |  |  |  |
|  | DAPK1 |  |  | HSPA8 |  |  |  |  |  | KIT |  |  |  |  | ITGB3 |  |  |  |
|  | DAPK2 |  |  | HSPB1 |  |  |  |  |  | KXD1 |  |  |  |  | KRAS |  |  |  |
|  | DAPK3 |  |  | HSPB8 |  |  |  |  |  | LAMP1 |  |  |  |  | THBS1 |  |  |  |
|  | DAPL1 |  |  | HTR2B |  |  |  |  |  | LAMP2 |  |  |  |  | BID |  |  |  |
|  | DAXX |  |  | HTRA2 |  |  |  |  |  | LAMP3 |  |  |  |  | HRAS |  |  |  |
|  | DBH |  |  | HTT |  |  |  |  |  | LAMTOR1 |  |  |  |  | CDK11B |  |  |  |
|  | DCC |  |  | HUWE1 |  |  |  |  |  | LAPTM4A |  |  |  |  | CDK11A |  |  |  |
|  | DDIAS |  |  | IFI16 |  |  |  |  |  | LAPTM4B |  |  |  |  | XIAP |  |  |  |
|  | DDIT3 |  |  | IFNG |  |  |  |  |  | LAPTM5 |  |  |  |  | PPARG |  |  |  |
|  | DDIT4 |  |  | IKBKG |  |  |  |  |  | LAT |  |  |  |  | IL6 |  |  |  |
|  | DDX3X |  |  | IL10 |  |  |  |  |  | LAT2 |  |  |  |  | MIR145 |  |  |  |
|  | DDX47 |  |  | IL10RA |  |  |  |  |  | LGALS9 |  |  |  |  | CCR7 |  |  |  |
|  | DDX5 |  |  | IL4 |  |  |  |  |  | LGMN |  |  |  |  | MSLN |  |  |  |
|  | DEDD |  |  | IRGM |  |  |  |  |  | LIPA |  |  |  |  | RAC1 |  |  |  |
|  | DEDD2 |  |  | ITPR1 |  |  |  |  |  | LRRK2 |  |  |  |  | GRHL2 |  |  |  |
|  | DELE1 |  |  | KAT5 |  |  |  |  |  | LYN |  |  |  |  | BIRC3 |  |  |  |
|  | DEPTOR |  |  | KAT8 |  |  |  |  |  | M6PR |  |  |  |  | NOTCH1 |  |  |  |
|  | DIABLO |  |  | KDM4A |  |  |  |  |  | MAN2B1 |  |  |  |  | RHOG |  |  |  |
|  | DIDO1 |  |  | KDR |  |  |  |  |  | MANBA |  |  |  |  | CCAR2 |  |  |  |
|  | DNAJA1 |  |  | KEAP1 |  |  |  |  |  | MAP1LC3A |  |  |  |  | NQO1 |  |  |  |
|  | DNAJC10 |  |  | KIF25 |  |  |  |  |  | MAP6 |  |  |  |  | MMP13 |  |  |  |
|  | DNM1L |  |  | KLHL22 |  |  |  |  |  | MCOLN1 |  |  |  |  | FAS |  |  |  |
|  | DPF2 |  |  | KLHL3 |  |  |  |  |  | MFSD8 |  |  |  |  | MTA1 |  |  |  |
|  | DYRK2 |  |  | LACRT |  |  |  |  |  | MILR1 |  |  |  |  | MYO5A |  |  |  |
|  | E2F1 |  |  | LAMP1 |  |  |  |  |  | MRGPRX2 |  |  |  |  | EDA2R |  |  |  |
|  | E2F2 |  |  | LAMP2 |  |  |  |  |  | MT3 |  |  |  |  | CCN6 |  |  |  |
|  | EDA2R |  |  | LAMP3 |  |  |  |  |  | MYH9 |  |  |  |  | MMP9 |  |  |  |
|  | EIF2AK3 |  |  | LAMTOR1 |  |  |  |  |  | NAGA |  |  |  |  | ABL1 |  |  |  |
|  | ELL3 |  |  | LAMTOR2 |  |  |  |  |  | NAGLU |  |  |  |  | MAPK11 |  |  |  |
|  | ENO1 |  |  | LAMTOR3 |  |  |  |  |  | NAGPA |  |  |  |  | SOD2 |  |  |  |
|  | EP300 |  |  | LAMTOR4 |  |  |  |  |  | NAPSA |  |  |  |  | PTHLH |  |  |  |
|  | EPHA2 |  |  | LAMTOR5 |  |  |  |  |  | NCOA4 |  |  |  |  | PDGFB |  |  |  |
|  | EPO |  |  | LARP1 |  |  |  |  |  | NDEL1 |  |  |  |  | GLI2 |  |  |  |
|  | ERBB3 |  |  | LEP |  |  |  |  |  | NEDD4 |  |  |  |  | EZH2 |  |  |  |
|  | ERCC6 |  |  | LEPR |  |  |  |  |  | NEU1 |  |  |  |  | RIPK1 |  |  |  |
|  | ERN1 |  |  | LGALS8 |  |  |  |  |  | NPC1 |  |  |  |  | CXCR4 |  |  |  |
|  | ERN2 |  |  | LRRK2 |  |  |  |  |  | NPC2 |  |  |  |  | HMGA1 |  |  |  |
|  | ERO1A |  |  | LRSAM1 |  |  |  |  |  | NR4A3 |  |  |  |  | SIK2 |  |  |  |
|  | ERP29 |  |  | LZTS1 |  |  |  |  |  | PDPK1 |  |  |  |  | TNFSF10 |  |  |  |
|  | EYA1 |  |  | MAP1LC3A |  |  |  |  |  | PIK3C3 |  |  |  |  | ANGPTL2 |  |  |  |
|  | EYA2 |  |  | MAP1LC3B |  |  |  |  |  | PIK3CD |  |  |  |  | S100A4 |  |  |  |
|  | EYA3 |  |  | MAP1LC3C |  |  |  |  |  | PIK3CG |  |  |  |  | NTF3 |  |  |  |
|  | EYA4 |  |  | MAP3K7 |  |  |  |  |  | PIP4K2A |  |  |  |  | ETV4 |  |  |  |
|  | FADD |  |  | MAPK15 |  |  |  |  |  | PIP4K2B |  |  |  |  | MIR21 |  |  |  |
|  | FAF1 |  |  | MAPK3 |  |  |  |  |  | PIP4P1 |  |  |  |  | MIR124-1 |  |  |  |
|  | FAIM |  |  | MAPK8 |  |  |  |  |  | PLA2G15 |  |  |  |  | HTRA1 |  |  |  |
|  | FAIM2 |  |  | MAPT |  |  |  |  |  | PLA2G3 |  |  |  |  | LATS1 |  |  |  |
|  | FAM162A |  |  | MCL1 |  |  |  |  |  | PLEKHM1 |  |  |  |  | CEACAM3 |  |  |  |
|  | FAS |  |  | MEFV |  |  |  |  |  | PLEKHM2 |  |  |  |  | EIF2AK3 |  |  |  |
|  | FASLG |  |  | MET |  |  |  |  |  | PPT1 |  |  |  |  | LAMC2 |  |  |  |
|  | FASTK |  |  | MFN2 |  |  |  |  |  | PPT2 |  |  |  |  | LAMA3 |  |  |  |
|  | FBH1 |  |  | MFSD8 |  |  |  |  |  | PSAP |  |  |  |  | LAMB3 |  |  |  |
|  | FBXW7 |  |  | MID2 |  |  |  |  |  | PSAPL1 |  |  |  |  | CDH2 |  |  |  |
|  | FEM1B |  |  | MIR199A1 |  |  |  |  |  | PTGDR |  |  |  |  | CSNK2A1 |  |  |  |
|  | FGA |  |  | MIRLET7B |  |  |  |  |  | PTGDS |  |  |  |  | EDIL3 |  |  |  |
|  | FGB |  |  | MLST8 |  |  |  |  |  | RAB34 |  |  |  |  | ZEB2 |  |  |  |
|  | FGF10 |  |  | MT3 |  |  |  |  |  | RAB3A |  |  |  |  | TLN1 |  |  |  |
|  | FGFR1 |  |  | MTCL1 |  |  |  |  |  | RAB7A |  |  |  |  | EPHA2 |  |  |  |
|  | FGFR3 |  |  | MTDH |  |  |  |  |  | RAC2 |  |  |  |  | SIRT3 |  |  |  |
|  | FGG |  |  | MTM1 |  |  |  |  |  | RUBCNL |  |  |  |  | OLFM3 |  |  |  |
|  | FHIT |  |  | MTMR3 |  |  |  |  |  | S100A13 |  |  |  |  | CLU |  |  |  |
|  | FIGNL1 |  |  | MTMR4 |  |  |  |  |  | SCARB2 |  |  |  |  | SPINK1 |  |  |  |
|  | FIS1 |  |  | MTMR8 |  |  |  |  |  | SGSH |  |  |  |  | CPEB2 |  |  |  |
|  | FNIP2 |  |  | MTMR9 |  |  |  |  |  | SLC11A1 |  |  |  |  | NAT1 |  |  |  |
|  | FXN |  |  | MTOR |  |  |  |  |  | SLC11A2 |  |  |  |  | TSG101 |  |  |  |
|  | FYN |  |  | NCOA4 |  |  |  |  |  | SLC17A5 |  |  |  |  | MIR200A |  |  |  |
|  | FZD9 |  |  | NEDD4 |  |  |  |  |  | SMPD1 |  |  |  |  | MIR6744 |  |  |  |
|  | G0S2 |  |  | NLRP6 |  |  |  |  |  | SNAP23 |  |  |  |  | SERPINA1 |  |  |  |
|  | GABARAP |  |  | NOD1 |  |  |  |  |  | SNAPIN |  |  |  |  | AKT3 |  |  |  |
|  | GATA1 |  |  | NOD2 |  |  |  |  |  | SNX16 |  |  |  |  | RELA |  |  |  |
|  | GATA4 |  |  | NPC1 |  |  |  |  |  | SNX4 |  |  |  |  | TNFRSF1A |  |  |  |
|  | GCLM |  |  | NPRL2 |  |  |  |  |  | SORL1 |  |  |  |  | FASLG |  |  |  |
|  | GDNF |  |  | NRBP2 |  |  |  |  |  | SORT1 |  |  |  |  | AFP |  |  |  |
|  | GFRAL |  |  | NUPR1 |  |  |  |  |  | SPAG9 |  |  |  |  | ITGA8 |  |  |  |
|  | GGCT |  |  | OPTN |  |  |  |  |  | SPHK2 |  |  |  |  | NOX4 |  |  |  |
|  | GHITM |  |  | ORMDL3 |  |  |  |  |  | SQSTM1 |  |  |  |  | PBK |  |  |  |
|  | GNAI2 |  |  | OSBPL7 |  |  |  |  |  | STXBP1 |  |  |  |  | SATB1 |  |  |  |
|  | GNAI3 |  |  | PAFAH1B2 |  |  |  |  |  | STXBP2 |  |  |  |  | CD63 |  |  |  |
|  | GPER1 |  |  | PARK7 |  |  |  |  |  | SUMF1 |  |  |  |  | EEF1A1 |  |  |  |
|  | GPX1 |  |  | PHB2 |  |  |  |  |  | SYK |  |  |  |  | LTB4R2 |  |  |  |
|  | GRINA |  |  | PHF23 |  |  |  |  |  | SYTL4 |  |  |  |  | MAVS |  |  |  |
|  | GSDME |  |  | PIK3C2A |  |  |  |  |  | TCIRG1 |  |  |  |  | HRC |  |  |  |
|  | GSK3A |  |  | PIK3C3 |  |  |  |  |  | TFEB |  |  |  |  | CCN2 |  |  |  |
|  | GSK3B |  |  | PIK3CA |  |  |  |  |  | TMEM106B |  |  |  |  | RHOB |  |  |  |
|  | GSKIP |  |  | PIK3CB |  |  |  |  |  | TPP1 |  |  |  |  | PPP1R13B |  |  |  |
|  | GSTP1 |  |  | PIK3R2 |  |  |  |  |  | UNC13D |  |  |  |  | PLG |  |  |  |
|  | GZMB |  |  | PIM2 |  |  |  |  |  | VAMP7 |  |  |  |  | MET |  |  |  |
|  | HDAC1 |  |  | PINK1 |  |  |  |  |  | VAMP8 |  |  |  |  | RAF1 |  |  |  |
|  | HERPUD1 |  |  | PIP4K2A |  |  |  |  |  | VPS33A |  |  |  |  | PARP1 |  |  |  |
|  | HGF |  |  | PIP4K2B |  |  |  |  |  | VPS33B |  |  |  |  | PRKCQ |  |  |  |
|  | HIC1 |  |  | PIP4K2C |  |  |  |  |  | VPS4A |  |  |  |  | BRCA2 |  |  |  |
|  | HIF1A |  |  | PJVK |  |  |  |  |  | WASH3P |  |  |  |  | RB1 |  |  |  |
|  | HINT1 |  |  | PLEKHF1 |  |  |  |  |  | ZFYVE16 |  |  |  |  | SP1 |  |  |  |
|  | HIP1 |  |  | PLK2 |  |  |  |  |  |  |  |  |  |  | HAVCR2 |  |  |  |
|  | HIP1R |  |  | PLK3 |  |  |  |  |  |  |  |  |  |  | DOCK1 |  |  |  |
|  | HIPK1 |  |  | POLDIP2 |  |  |  |  |  |  |  |  |  |  | VTN |  |  |  |
|  | HIPK2 |  |  | PRKAA1 |  |  |  |  |  |  |  |  |  |  | INHBB |  |  |  |
|  | HMGB2 |  |  | PRKAA2 |  |  |  |  |  |  |  |  |  |  | PDCD4 |  |  |  |
|  | HMOX1 |  |  | PRKAB1 |  |  |  |  |  |  |  |  |  |  | PRPF4B |  |  |  |
|  | HNRNPK |  |  | PRKAB2 |  |  |  |  |  |  |  |  |  |  | RANBP9 |  |  |  |
|  | HRAS |  |  | PRKACA |  |  |  |  |  |  |  |  |  |  | SESN1 |  |  |  |
|  | HRK |  |  | PRKAG1 |  |  |  |  |  |  |  |  |  |  | SESN3 |  |  |  |
|  | HSPA1A |  |  | PRKAG2 |  |  |  |  |  |  |  |  |  |  | CD24 |  |  |  |
|  | HSPA1B |  |  | PRKAG3 |  |  |  |  |  |  |  |  |  |  | ZBTB7A |  |  |  |
|  | HSPB1 |  |  | PRKD1 |  |  |  |  |  |  |  |  |  |  | MIR141 |  |  |  |
|  | HTRA2 |  |  | PRKN |  |  |  |  |  |  |  |  |  |  | ELANE |  |  |  |
|  | HTT |  |  | PSAP |  |  |  |  |  |  |  |  |  |  | KDR |  |  |  |
|  | HYAL2 |  |  | PTPN22 |  |  |  |  |  |  |  |  |  |  | MDM2 |  |  |  |
|  | HYOU1 |  |  | PYCARD |  |  |  |  |  |  |  |  |  |  | NFE2L2 |  |  |  |
|  | ICAM1 |  |  | QSOX1 |  |  |  |  |  |  |  |  |  |  | ZEB1 |  |  |  |
|  | IFI16 |  |  | RAB39B |  |  |  |  |  |  |  |  |  |  | KL |  |  |  |
|  | IFI27 |  |  | RAB3GAP1 |  |  |  |  |  |  |  |  |  |  | PRKCI |  |  |  |
|  | IFI27L1 |  |  | RAB3GAP2 |  |  |  |  |  |  |  |  |  |  | CRYAB |  |  |  |
|  | IFI27L2 |  |  | RAB7A |  |  |  |  |  |  |  |  |  |  | EPHB6 |  |  |  |
|  | IFI6 |  |  | RAB8A |  |  |  |  |  |  |  |  |  |  | FGF2 |  |  |  |
|  | IFNB1 |  |  | RALB |  |  |  |  |  |  |  |  |  |  | HK2 |  |  |  |
|  | IFNG |  |  | RASIP1 |  |  |  |  |  |  |  |  |  |  | LTF |  |  |  |
|  | IGF1 |  |  | RB1CC1 |  |  |  |  |  |  |  |  |  |  | IQGAP1 |  |  |  |
|  | IKBKE |  |  | RETREG1 |  |  |  |  |  |  |  |  |  |  | MGAT5 |  |  |  |
|  | IL12A |  |  | RETREG3 |  |  |  |  |  |  |  |  |  |  | SDCBP |  |  |  |
|  | IL19 |  |  | RHEB |  |  |  |  |  |  |  |  |  |  | ABHD2 |  |  |  |
|  | IL1A |  |  | RIPK2 |  |  |  |  |  |  |  |  |  |  | SPIB |  |  |  |
|  | IL1B |  |  | RMC1 |  |  |  |  |  |  |  |  |  |  | TRIM31 |  |  |  |
|  | IL2 |  |  | RNF152 |  |  |  |  |  |  |  |  |  |  | MIR1827 |  |  |  |
|  | IL20RA |  |  | RNF41 |  |  |  |  |  |  |  |  |  |  | PDGFRB |  |  |  |
|  | IL33 |  |  | RNF5 |  |  |  |  |  |  |  |  |  |  | PLAT |  |  |  |
|  | IL4 |  |  | ROCK1 |  |  |  |  |  |  |  |  |  |  | TLR3 |  |  |  |
|  | IL6R |  |  | RPTOR |  |  |  |  |  |  |  |  |  |  | NRAS |  |  |  |
|  | IL7 |  |  | RRAGA |  |  |  |  |  |  |  |  |  |  | ROCK1 |  |  |  |
|  | INCA1 |  |  | RRAGB |  |  |  |  |  |  |  |  |  |  | PAK4 |  |  |  |
|  | ING2 |  |  | RRAGC |  |  |  |  |  |  |  |  |  |  | VEGFA |  |  |  |
|  | ING5 |  |  | RRAGD |  |  |  |  |  |  |  |  |  |  | CASP10 |  |  |  |
|  | INHBA |  |  | RUBCN |  |  |  |  |  |  |  |  |  |  | PIN1 |  |  |  |
|  | INHBB |  |  | RUFY4 |  |  |  |  |  |  |  |  |  |  | IL1RAP |  |  |  |
|  | INS |  |  | SCFD1 |  |  |  |  |  |  |  |  |  |  | UBE2C |  |  |  |
|  | ITGA6 |  |  | SCOC |  |  |  |  |  |  |  |  |  |  | YWHAZ |  |  |  |
|  | ITGAM |  |  | SEC22B |  |  |  |  |  |  |  |  |  |  | TWIST1 |  |  |  |
|  | ITGAV |  |  | SESN1 |  |  |  |  |  |  |  |  |  |  | BMP6 |  |  |  |
|  | ITM2C |  |  | SESN2 |  |  |  |  |  |  |  |  |  |  | BNIP3L |  |  |  |
|  | ITPR1 |  |  | SESN3 |  |  |  |  |  |  |  |  |  |  | ELK1 |  |  |  |
|  | ITPRIP |  |  | SH3BP4 |  |  |  |  |  |  |  |  |  |  | KDM3A |  |  |  |
|  | IVNS1ABP |  |  | SH3GLB1 |  |  |  |  |  |  |  |  |  |  | PRDX4 |  |  |  |
|  | JAK2 |  |  | SIRT1 |  |  |  |  |  |  |  |  |  |  | BNIP3 |  |  |  |
|  | JMY |  |  | SIRT2 |  |  |  |  |  |  |  |  |  |  | LMO3 |  |  |  |
|  | JUN |  |  | SLC38A9 |  |  |  |  |  |  |  |  |  |  | ZNF32 |  |  |  |
|  | KDM1A |  |  | SMCR8 |  |  |  |  |  |  |  |  |  |  | MIR200B |  |  |  |
|  | KITLG |  |  | SMG1 |  |  |  |  |  |  |  |  |  |  | MIR525 |  |  |  |
|  | KRT18 |  |  | SNCA |  |  |  |  |  |  |  |  |  |  | MIR363 |  |  |  |
|  | KRT8 |  |  | SNRNP70 |  |  |  |  |  |  |  |  |  |  | TUBB3 |  |  |  |
|  | LCK |  |  | SNX32 |  |  |  |  |  |  |  |  |  |  | HSP90B1 |  |  |  |
|  | LGALS12 |  |  | SNX5 |  |  |  |  |  |  |  |  |  |  | SLC2A1 |  |  |  |
|  | LGALS3 |  |  | SNX6 |  |  |  |  |  |  |  |  |  |  | HMOX1 |  |  |  |
|  | LRRK2 |  |  | SOGA1 |  |  |  |  |  |  |  |  |  |  | PTPN11 |  |  |  |
|  | LTBR |  |  | SOGA3 |  |  |  |  |  |  |  |  |  |  | PRKACA |  |  |  |
|  | LY96 |  |  | SPTLC1 |  |  |  |  |  |  |  |  |  |  | PAK3 |  |  |  |
|  | MADD |  |  | SPTLC2 |  |  |  |  |  |  |  |  |  |  | CD36 |  |  |  |
|  | MAEL |  |  | SQSTM1 |  |  |  |  |  |  |  |  |  |  | PIK3R2 |  |  |  |
|  | MAGEA3 |  |  | SREBF1 |  |  |  |  |  |  |  |  |  |  | PPP2CA |  |  |  |
|  | MAP2K5 |  |  | SREBF2 |  |  |  |  |  |  |  |  |  |  | CASP6 |  |  |  |
|  | MAP3K5 |  |  | STAT3 |  |  |  |  |  |  |  |  |  |  | CDH3 |  |  |  |
|  | MAPK7 |  |  | STBD1 |  |  |  |  |  |  |  |  |  |  | EEF2K |  |  |  |
|  | MAPK8 |  |  | STING1 |  |  |  |  |  |  |  |  |  |  | LRP1 |  |  |  |
|  | MAPK8IP1 |  |  | STK11 |  |  |  |  |  |  |  |  |  |  | PAK2 |  |  |  |
|  | MAPK8IP2 |  |  | STUB1 |  |  |  |  |  |  |  |  |  |  | PTK6 |  |  |  |
|  | MAPK9 |  |  | SUPT5H |  |  |  |  |  |  |  |  |  |  | LPAR1 |  |  |  |
|  | MARCHF7 |  |  | SVIP |  |  |  |  |  |  |  |  |  |  | TCF7L2 |  |  |  |
|  | MAZ |  |  | SYNPO2 |  |  |  |  |  |  |  |  |  |  | CEACAM1 |  |  |  |
|  | MCL1 |  |  | TAB2 |  |  |  |  |  |  |  |  |  |  | GDF2 |  |  |  |
|  | MDM2 |  |  | TAB3 |  |  |  |  |  |  |  |  |  |  | GLO1 |  |  |  |
|  | MELK |  |  | TBC1D14 |  |  |  |  |  |  |  |  |  |  | IL17A |  |  |  |
|  | MFF |  |  | TBC1D25 |  |  |  |  |  |  |  |  |  |  | RBL2 |  |  |  |
|  | MIF |  |  | TBK1 |  |  |  |  |  |  |  |  |  |  | SIRPA |  |  |  |
|  | MIR132 |  |  | TEX264 |  |  |  |  |  |  |  |  |  |  | TRAF2 |  |  |  |
|  | MIR15A |  |  | TFEB |  |  |  |  |  |  |  |  |  |  | ADCY10 |  |  |  |
|  | MIR16-1 |  |  | TICAM1 |  |  |  |  |  |  |  |  |  |  | VPS37A |  |  |  |
|  | MIR17 |  |  | TIGAR |  |  |  |  |  |  |  |  |  |  | TNFRSF12A |  |  |  |
|  | MIR198 |  |  | TLK2 |  |  |  |  |  |  |  |  |  |  | APOBEC3G |  |  |  |
|  | MIR21 |  |  | TMEM150A |  |  |  |  |  |  |  |  |  |  | BAG1 |  |  |  |
|  | MIR210 |  |  | TMEM150B |  |  |  |  |  |  |  |  |  |  | COL13A1 |  |  |  |
|  | MIR221 |  |  | TMEM150C |  |  |  |  |  |  |  |  |  |  | MNX1 |  |  |  |
|  | MIR222 |  |  | TMEM39A |  |  |  |  |  |  |  |  |  |  | RAD9A |  |  |  |
|  | MIR26B |  |  | TMEM39B |  |  |  |  |  |  |  |  |  |  | IFI27 |  |  |  |
|  | MIR27B |  |  | TMEM59 |  |  |  |  |  |  |  |  |  |  | MEGF11 |  |  |  |
|  | MIR449A |  |  | TOMM7 |  |  |  |  |  |  |  |  |  |  | ITPRIP |  |  |  |
|  | MKNK2 |  |  | TP53 |  |  |  |  |  |  |  |  |  |  | BCL2L15 |  |  |  |
|  | MLH1 |  |  | TP53INP1 |  |  |  |  |  |  |  |  |  |  | SNAI2 |  |  |  |
|  | MLLT11 |  |  | TP53INP2 |  |  |  |  |  |  |  |  |  |  | PTPN1 |  |  |  |
|  | MMP9 |  |  | TPCN1 |  |  |  |  |  |  |  |  |  |  | NOTCH3 |  |  |  |
|  | MNT |  |  | TPCN2 |  |  |  |  |  |  |  |  |  |  | GLUD1 |  |  |  |
|  | MOAP1 |  |  | TREM2 |  |  |  |  |  |  |  |  |  |  | SIRT1 |  |  |  |
|  | MPV17L |  |  | TRIB3 |  |  |  |  |  |  |  |  |  |  | FASN |  |  |  |
|  | MSH2 |  |  | TRIM13 |  |  |  |  |  |  |  |  |  |  | MYH9 |  |  |  |
|  | MSH6 |  |  | TRIM14 |  |  |  |  |  |  |  |  |  |  | RPS6KB1 |  |  |  |
|  | MSX1 |  |  | TRIM21 |  |  |  |  |  |  |  |  |  |  | TPM1 |  |  |  |
|  | MUC1 |  |  | TRIM22 |  |  |  |  |  |  |  |  |  |  | PPP2R1A |  |  |  |
|  | MUL1 |  |  | TRIM27 |  |  |  |  |  |  |  |  |  |  | COL4A2 |  |  |  |
|  | MYBBP1A |  |  | TRIM34 |  |  |  |  |  |  |  |  |  |  | CTNND1 |  |  |  |
|  | NACC2 |  |  | TRIM38 |  |  |  |  |  |  |  |  |  |  | CD151 |  |  |  |
|  | NANOS3 |  |  | TRIM5 |  |  |  |  |  |  |  |  |  |  | MMP11 |  |  |  |
|  | NBN |  |  | TRIM6 |  |  |  |  |  |  |  |  |  |  | ARHGEF7 |  |  |  |
|  | NCK1 |  |  | TRIM65 |  |  |  |  |  |  |  |  |  |  | PPP2R2A |  |  |  |
|  | NCK2 |  |  | TRIM68 |  |  |  |  |  |  |  |  |  |  | SEMA7A |  |  |  |
|  | NDUFA13 |  |  | TRIM8 |  |  |  |  |  |  |  |  |  |  | PPP2R5A |  |  |  |
|  | NDUFS3 |  |  | TRIML1 |  |  |  |  |  |  |  |  |  |  | BST2 |  |  |  |
|  | NFATC4 |  |  | TRIML2 |  |  |  |  |  |  |  |  |  |  | CCN1 |  |  |  |
|  | NFE2L2 |  |  | TSC1 |  |  |  |  |  |  |  |  |  |  | PPP2R2D |  |  |  |
|  | NGF |  |  | TSC2 |  |  |  |  |  |  |  |  |  |  | CCDC178 |  |  |  |
|  | NGFR |  |  | TSPO |  |  |  |  |  |  |  |  |  |  | MIR10A |  |  |  |
|  | NKX3-1 |  |  | UBA5 |  |  |  |  |  |  |  |  |  |  | MIR30B |  |  |  |
|  | NLE1 |  |  | UBQLN1 |  |  |  |  |  |  |  |  |  |  | MIR30C1 |  |  |  |
|  | NME5 |  |  | UBQLN2 |  |  |  |  |  |  |  |  |  |  | SHC1 |  |  |  |
|  | NMT1 |  |  | UBQLN4 |  |  |  |  |  |  |  |  |  |  |  |  |  |  |
|  | NOC2L |  |  | UCHL1 |  |  |  |  |  |  |  |  |  |  |  |  |  |  |
|  | NOG |  |  | UFC1 |  |  |  |  |  |  |  |  |  |  |  |  |  |  |
|  | NOL3 |  |  | UFL1 |  |  |  |  |  |  |  |  |  |  |  |  |  |  |
|  | NONO |  |  | UFM1 |  |  |  |  |  |  |  |  |  |  |  |  |  |  |
|  | NOS3 |  |  | ULK1 |  |  |  |  |  |  |  |  |  |  |  |  |  |  |
|  | NOX1 |  |  | USP10 |  |  |  |  |  |  |  |  |  |  |  |  |  |  |
|  | NR4A2 |  |  | USP13 |  |  |  |  |  |  |  |  |  |  |  |  |  |  |
|  | NUPR1 |  |  | USP30 |  |  |  |  |  |  |  |  |  |  |  |  |  |  |
|  | OPA1 |  |  | USP33 |  |  |  |  |  |  |  |  |  |  |  |  |  |  |
|  | P2RX4 |  |  | USP36 |  |  |  |  |  |  |  |  |  |  |  |  |  |  |
|  | P2RX7 |  |  | UVRAG |  |  |  |  |  |  |  |  |  |  |  |  |  |  |
|  | P4HB |  |  | VDAC1 |  |  |  |  |  |  |  |  |  |  |  |  |  |  |
|  | PAK2 |  |  | VPS13C |  |  |  |  |  |  |  |  |  |  |  |  |  |  |
|  | PAK5 |  |  | VPS13D |  |  |  |  |  |  |  |  |  |  |  |  |  |  |
|  | PARK7 |  |  | VPS26A |  |  |  |  |  |  |  |  |  |  |  |  |  |  |
|  | PARP1 |  |  | VPS26B |  |  |  |  |  |  |  |  |  |  |  |  |  |  |
|  | PARP2 |  |  | VPS35 |  |  |  |  |  |  |  |  |  |  |  |  |  |  |
|  | PAWR |  |  | WAC |  |  |  |  |  |  |  |  |  |  |  |  |  |  |
|  | PCGF2 |  |  | WASHC1 |  |  |  |  |  |  |  |  |  |  |  |  |  |  |
|  | PDCD10 |  |  | WDFY3 |  |  |  |  |  |  |  |  |  |  |  |  |  |  |
|  | PDCD5 |  |  | WDR24 |  |  |  |  |  |  |  |  |  |  |  |  |  |  |
|  | PDCD6 |  |  | WDR41 |  |  |  |  |  |  |  |  |  |  |  |  |  |  |
|  | PDIA3 |  |  | WDR6 |  |  |  |  |  |  |  |  |  |  |  |  |  |  |
|  | PDK1 |  |  | WDR81 |  |  |  |  |  |  |  |  |  |  |  |  |  |  |
|  | PDK2 |  |  | WIPI2 |  |  |  |  |  |  |  |  |  |  |  |  |  |  |
|  | PDPK1 |  |  | ZC3H12A |  |  |  |  |  |  |  |  |  |  |  |  |  |  |
|  | PDX1 |  |  | ZKSCAN3 |  |  |  |  |  |  |  |  |  |  |  |  |  |  |
|  | PEA15 |  |  | ZMPSTE24 |  |  |  |  |  |  |  |  |  |  |  |  |  |  |
|  | PELI3 |  |  |  |  |  |  |  |  |  |  |  |  |  |  |  |  |  |
|  | PERP |  |  |  |  |  |  |  |  |  |  |  |  |  |  |  |  |  |
|  | PF4 |  |  |  |  |  |  |  |  |  |  |  |  |  |  |  |  |  |
|  | PHIP |  |  |  |  |  |  |  |  |  |  |  |  |  |  |  |  |  |
|  | PHLDA3 |  |  |  |  |  |  |  |  |  |  |  |  |  |  |  |  |  |
|  | PIAS4 |  |  |  |  |  |  |  |  |  |  |  |  |  |  |  |  |  |
|  | PIDD1 |  |  |  |  |  |  |  |  |  |  |  |  |  |  |  |  |  |
|  | PIH1D1 |  |  |  |  |  |  |  |  |  |  |  |  |  |  |  |  |  |
|  | PIK3R1 |  |  |  |  |  |  |  |  |  |  |  |  |  |  |  |  |  |
|  | PINK1 |  |  |  |  |  |  |  |  |  |  |  |  |  |  |  |  |  |
|  | PLAGL2 |  |  |  |  |  |  |  |  |  |  |  |  |  |  |  |  |  |
|  | PLAUR |  |  |  |  |  |  |  |  |  |  |  |  |  |  |  |  |  |
|  | PLEKHF1 |  |  |  |  |  |  |  |  |  |  |  |  |  |  |  |  |  |
|  | PLSCR3 |  |  |  |  |  |  |  |  |  |  |  |  |  |  |  |  |  |
|  | PMAIP1 |  |  |  |  |  |  |  |  |  |  |  |  |  |  |  |  |  |
|  | PML |  |  |  |  |  |  |  |  |  |  |  |  |  |  |  |  |  |
|  | POLB |  |  |  |  |  |  |  |  |  |  |  |  |  |  |  |  |  |
|  | POU4F1 |  |  |  |  |  |  |  |  |  |  |  |  |  |  |  |  |  |
|  | POU4F2 |  |  |  |  |  |  |  |  |  |  |  |  |  |  |  |  |  |
|  | PPARD |  |  |  |  |  |  |  |  |  |  |  |  |  |  |  |  |  |
|  | PPIA |  |  |  |  |  |  |  |  |  |  |  |  |  |  |  |  |  |
|  | PPIF |  |  |  |  |  |  |  |  |  |  |  |  |  |  |  |  |  |
|  | PPM1F |  |  |  |  |  |  |  |  |  |  |  |  |  |  |  |  |  |
|  | PPP1CA |  |  |  |  |  |  |  |  |  |  |  |  |  |  |  |  |  |
|  | PPP1R13B |  |  |  |  |  |  |  |  |  |  |  |  |  |  |  |  |  |
|  | PPP1R15A |  |  |  |  |  |  |  |  |  |  |  |  |  |  |  |  |  |
|  | PPP2R1B |  |  |  |  |  |  |  |  |  |  |  |  |  |  |  |  |  |
|  | PPP3CC |  |  |  |  |  |  |  |  |  |  |  |  |  |  |  |  |  |
|  | PPP3R1 |  |  |  |  |  |  |  |  |  |  |  |  |  |  |  |  |  |
|  | PRDX2 |  |  |  |  |  |  |  |  |  |  |  |  |  |  |  |  |  |
|  | PRELID1 |  |  |  |  |  |  |  |  |  |  |  |  |  |  |  |  |  |
|  | PRKCA |  |  |  |  |  |  |  |  |  |  |  |  |  |  |  |  |  |
|  | PRKCD |  |  |  |  |  |  |  |  |  |  |  |  |  |  |  |  |  |
|  | PRKDC |  |  |  |  |  |  |  |  |  |  |  |  |  |  |  |  |  |
|  | PRKN |  |  |  |  |  |  |  |  |  |  |  |  |  |  |  |  |  |
|  | PRKRA |  |  |  |  |  |  |  |  |  |  |  |  |  |  |  |  |  |
|  | PRODH |  |  |  |  |  |  |  |  |  |  |  |  |  |  |  |  |  |
|  | PSEN1 |  |  |  |  |  |  |  |  |  |  |  |  |  |  |  |  |  |
|  | PSMD10 |  |  |  |  |  |  |  |  |  |  |  |  |  |  |  |  |  |
|  | PSME3 |  |  |  |  |  |  |  |  |  |  |  |  |  |  |  |  |  |
|  | PTEN |  |  |  |  |  |  |  |  |  |  |  |  |  |  |  |  |  |
|  | PTGIS |  |  |  |  |  |  |  |  |  |  |  |  |  |  |  |  |  |
|  | PTH |  |  |  |  |  |  |  |  |  |  |  |  |  |  |  |  |  |
|  | PTPMT1 |  |  |  |  |  |  |  |  |  |  |  |  |  |  |  |  |  |
|  | PTPN1 |  |  |  |  |  |  |  |  |  |  |  |  |  |  |  |  |  |
|  | PTPN2 |  |  |  |  |  |  |  |  |  |  |  |  |  |  |  |  |  |
|  | PTPRC |  |  |  |  |  |  |  |  |  |  |  |  |  |  |  |  |  |
|  | PTTG1IP |  |  |  |  |  |  |  |  |  |  |  |  |  |  |  |  |  |
|  | PYCARD |  |  |  |  |  |  |  |  |  |  |  |  |  |  |  |  |  |
|  | QARS1 |  |  |  |  |  |  |  |  |  |  |  |  |  |  |  |  |  |
|  | RACK1 |  |  |  |  |  |  |  |  |  |  |  |  |  |  |  |  |  |
|  | RAF1 |  |  |  |  |  |  |  |  |  |  |  |  |  |  |  |  |  |
|  | RB1 |  |  |  |  |  |  |  |  |  |  |  |  |  |  |  |  |  |
|  | RB1CC1 |  |  |  |  |  |  |  |  |  |  |  |  |  |  |  |  |  |
|  | RBCK1 |  |  |  |  |  |  |  |  |  |  |  |  |  |  |  |  |  |
|  | RELA |  |  |  |  |  |  |  |  |  |  |  |  |  |  |  |  |  |
|  | RET |  |  |  |  |  |  |  |  |  |  |  |  |  |  |  |  |  |
|  | RFFL |  |  |  |  |  |  |  |  |  |  |  |  |  |  |  |  |  |
|  | RHOT1 |  |  |  |  |  |  |  |  |  |  |  |  |  |  |  |  |  |
|  | RHOT2 |  |  |  |  |  |  |  |  |  |  |  |  |  |  |  |  |  |
|  | RIPK1 |  |  |  |  |  |  |  |  |  |  |  |  |  |  |  |  |  |
|  | RIPK3 |  |  |  |  |  |  |  |  |  |  |  |  |  |  |  |  |  |
|  | RNF183 |  |  |  |  |  |  |  |  |  |  |  |  |  |  |  |  |  |
|  | RNF186 |  |  |  |  |  |  |  |  |  |  |  |  |  |  |  |  |  |
|  | RNF34 |  |  |  |  |  |  |  |  |  |  |  |  |  |  |  |  |  |
|  | RNF41 |  |  |  |  |  |  |  |  |  |  |  |  |  |  |  |  |  |
|  | RPL11 |  |  |  |  |  |  |  |  |  |  |  |  |  |  |  |  |  |
|  | RPL26 |  |  |  |  |  |  |  |  |  |  |  |  |  |  |  |  |  |
|  | RPS27L |  |  |  |  |  |  |  |  |  |  |  |  |  |  |  |  |  |
|  | RPS3 |  |  |  |  |  |  |  |  |  |  |  |  |  |  |  |  |  |
|  | RPS6KB1 |  |  |  |  |  |  |  |  |  |  |  |  |  |  |  |  |  |
|  | RPS7 |  |  |  |  |  |  |  |  |  |  |  |  |  |  |  |  |  |
|  | RRP8 |  |  |  |  |  |  |  |  |  |  |  |  |  |  |  |  |  |
|  | RTKN2 |  |  |  |  |  |  |  |  |  |  |  |  |  |  |  |  |  |
|  | RTL10 |  |  |  |  |  |  |  |  |  |  |  |  |  |  |  |  |  |
|  | S100A8 |  |  |  |  |  |  |  |  |  |  |  |  |  |  |  |  |  |
|  | S100A9 |  |  |  |  |  |  |  |  |  |  |  |  |  |  |  |  |  |
|  | SCG2 |  |  |  |  |  |  |  |  |  |  |  |  |  |  |  |  |  |
|  | SCN2A |  |  |  |  |  |  |  |  |  |  |  |  |  |  |  |  |  |
|  | SCRT2 |  |  |  |  |  |  |  |  |  |  |  |  |  |  |  |  |  |
|  | SELENOK |  |  |  |  |  |  |  |  |  |  |  |  |  |  |  |  |  |
|  | SELENOS |  |  |  |  |  |  |  |  |  |  |  |  |  |  |  |  |  |
|  | SENP1 |  |  |  |  |  |  |  |  |  |  |  |  |  |  |  |  |  |
|  | SEPTIN4 |  |  |  |  |  |  |  |  |  |  |  |  |  |  |  |  |  |
|  | SERINC3 |  |  |  |  |  |  |  |  |  |  |  |  |  |  |  |  |  |
|  | SERPINE1 |  |  |  |  |  |  |  |  |  |  |  |  |  |  |  |  |  |
|  | SFN |  |  |  |  |  |  |  |  |  |  |  |  |  |  |  |  |  |
|  | SFPQ |  |  |  |  |  |  |  |  |  |  |  |  |  |  |  |  |  |
|  | SFRP1 |  |  |  |  |  |  |  |  |  |  |  |  |  |  |  |  |  |
|  | SFRP2 |  |  |  |  |  |  |  |  |  |  |  |  |  |  |  |  |  |
|  | SGMS1 |  |  |  |  |  |  |  |  |  |  |  |  |  |  |  |  |  |
|  | SGPL1 |  |  |  |  |  |  |  |  |  |  |  |  |  |  |  |  |  |
|  | SGPP1 |  |  |  |  |  |  |  |  |  |  |  |  |  |  |  |  |  |
|  | SH3RF1 |  |  |  |  |  |  |  |  |  |  |  |  |  |  |  |  |  |
|  | SHH |  |  |  |  |  |  |  |  |  |  |  |  |  |  |  |  |  |
|  | SHISA5 |  |  |  |  |  |  |  |  |  |  |  |  |  |  |  |  |  |
|  | SIAH1 |  |  |  |  |  |  |  |  |  |  |  |  |  |  |  |  |  |
|  | SIAH2 |  |  |  |  |  |  |  |  |  |  |  |  |  |  |  |  |  |
|  | SIRT1 |  |  |  |  |  |  |  |  |  |  |  |  |  |  |  |  |  |
|  | SIVA1 |  |  |  |  |  |  |  |  |  |  |  |  |  |  |  |  |  |
|  | SKIL |  |  |  |  |  |  |  |  |  |  |  |  |  |  |  |  |  |
|  | SLC25A5 |  |  |  |  |  |  |  |  |  |  |  |  |  |  |  |  |  |
|  | SLC35F6 |  |  |  |  |  |  |  |  |  |  |  |  |  |  |  |  |  |
|  | SLC9A3R1 |  |  |  |  |  |  |  |  |  |  |  |  |  |  |  |  |  |
|  | SMAD3 |  |  |  |  |  |  |  |  |  |  |  |  |  |  |  |  |  |
|  | SNAI1 |  |  |  |  |  |  |  |  |  |  |  |  |  |  |  |  |  |
|  | SNAI2 |  |  |  |  |  |  |  |  |  |  |  |  |  |  |  |  |  |
|  | SNW1 |  |  |  |  |  |  |  |  |  |  |  |  |  |  |  |  |  |
|  | SOD1 |  |  |  |  |  |  |  |  |  |  |  |  |  |  |  |  |  |
|  | SOD2 |  |  |  |  |  |  |  |  |  |  |  |  |  |  |  |  |  |
|  | SORT1 |  |  |  |  |  |  |  |  |  |  |  |  |  |  |  |  |  |
|  | SP100 |  |  |  |  |  |  |  |  |  |  |  |  |  |  |  |  |  |
|  | SRC |  |  |  |  |  |  |  |  |  |  |  |  |  |  |  |  |  |
|  | SRPX |  |  |  |  |  |  |  |  |  |  |  |  |  |  |  |  |  |
|  | SST |  |  |  |  |  |  |  |  |  |  |  |  |  |  |  |  |  |
|  | SSTR3 |  |  |  |  |  |  |  |  |  |  |  |  |  |  |  |  |  |
|  | ST20 |  |  |  |  |  |  |  |  |  |  |  |  |  |  |  |  |  |
|  | STK11 |  |  |  |  |  |  |  |  |  |  |  |  |  |  |  |  |  |
|  | STK24 |  |  |  |  |  |  |  |  |  |  |  |  |  |  |  |  |  |
|  | STK25 |  |  |  |  |  |  |  |  |  |  |  |  |  |  |  |  |  |
|  | STK3 |  |  |  |  |  |  |  |  |  |  |  |  |  |  |  |  |  |
|  | STK4 |  |  |  |  |  |  |  |  |  |  |  |  |  |  |  |  |  |
|  | STRADB |  |  |  |  |  |  |  |  |  |  |  |  |  |  |  |  |  |
|  | STX4 |  |  |  |  |  |  |  |  |  |  |  |  |  |  |  |  |  |
|  | STYXL1 |  |  |  |  |  |  |  |  |  |  |  |  |  |  |  |  |  |
|  | SYVN1 |  |  |  |  |  |  |  |  |  |  |  |  |  |  |  |  |  |
|  | TAF9 |  |  |  |  |  |  |  |  |  |  |  |  |  |  |  |  |  |
|  | TAF9B |  |  |  |  |  |  |  |  |  |  |  |  |  |  |  |  |  |
|  | TCF7L2 |  |  |  |  |  |  |  |  |  |  |  |  |  |  |  |  |  |
|  | TERT |  |  |  |  |  |  |  |  |  |  |  |  |  |  |  |  |  |
|  | TFDP1 |  |  |  |  |  |  |  |  |  |  |  |  |  |  |  |  |  |
|  | TFDP2 |  |  |  |  |  |  |  |  |  |  |  |  |  |  |  |  |  |
|  | TFPT |  |  |  |  |  |  |  |  |  |  |  |  |  |  |  |  |  |
|  | TGFB1 |  |  |  |  |  |  |  |  |  |  |  |  |  |  |  |  |  |
|  | TGFB2 |  |  |  |  |  |  |  |  |  |  |  |  |  |  |  |  |  |
|  | TGFBR1 |  |  |  |  |  |  |  |  |  |  |  |  |  |  |  |  |  |
|  | THBS1 |  |  |  |  |  |  |  |  |  |  |  |  |  |  |  |  |  |
|  | TICAM1 |  |  |  |  |  |  |  |  |  |  |  |  |  |  |  |  |  |
|  | TICAM2 |  |  |  |  |  |  |  |  |  |  |  |  |  |  |  |  |  |
|  | TIMM50 |  |  |  |  |  |  |  |  |  |  |  |  |  |  |  |  |  |
|  | TIMP3 |  |  |  |  |  |  |  |  |  |  |  |  |  |  |  |  |  |
|  | TLR3 |  |  |  |  |  |  |  |  |  |  |  |  |  |  |  |  |  |
|  | TLR4 |  |  |  |  |  |  |  |  |  |  |  |  |  |  |  |  |  |
|  | TM2D1 |  |  |  |  |  |  |  |  |  |  |  |  |  |  |  |  |  |
|  | TMBIM1 |  |  |  |  |  |  |  |  |  |  |  |  |  |  |  |  |  |
|  | TMBIM6 |  |  |  |  |  |  |  |  |  |  |  |  |  |  |  |  |  |
|  | TMC8 |  |  |  |  |  |  |  |  |  |  |  |  |  |  |  |  |  |
|  | TMEM102 |  |  |  |  |  |  |  |  |  |  |  |  |  |  |  |  |  |
|  | TMEM109 |  |  |  |  |  |  |  |  |  |  |  |  |  |  |  |  |  |
|  | TMEM117 |  |  |  |  |  |  |  |  |  |  |  |  |  |  |  |  |  |
|  | TMEM14A |  |  |  |  |  |  |  |  |  |  |  |  |  |  |  |  |  |
|  | TMEM161A |  |  |  |  |  |  |  |  |  |  |  |  |  |  |  |  |  |
|  | TNF |  |  |  |  |  |  |  |  |  |  |  |  |  |  |  |  |  |
|  | TNFAIP3 |  |  |  |  |  |  |  |  |  |  |  |  |  |  |  |  |  |
|  | TNFRSF10A |  |  |  |  |  |  |  |  |  |  |  |  |  |  |  |  |  |
|  | TNFRSF10B |  |  |  |  |  |  |  |  |  |  |  |  |  |  |  |  |  |
|  | TNFRSF10C |  |  |  |  |  |  |  |  |  |  |  |  |  |  |  |  |  |
|  | TNFRSF12A |  |  |  |  |  |  |  |  |  |  |  |  |  |  |  |  |  |
|  | TNFRSF1A |  |  |  |  |  |  |  |  |  |  |  |  |  |  |  |  |  |
|  | TNFRSF1B |  |  |  |  |  |  |  |  |  |  |  |  |  |  |  |  |  |
|  | TNFRSF25 |  |  |  |  |  |  |  |  |  |  |  |  |  |  |  |  |  |
|  | TNFSF10 |  |  |  |  |  |  |  |  |  |  |  |  |  |  |  |  |  |
|  | TNFSF12 |  |  |  |  |  |  |  |  |  |  |  |  |  |  |  |  |  |
|  | TOPORS |  |  |  |  |  |  |  |  |  |  |  |  |  |  |  |  |  |
|  | TP53 |  |  |  |  |  |  |  |  |  |  |  |  |  |  |  |  |  |
|  | TP53BP2 |  |  |  |  |  |  |  |  |  |  |  |  |  |  |  |  |  |
|  | TP63 |  |  |  |  |  |  |  |  |  |  |  |  |  |  |  |  |  |
|  | TP73 |  |  |  |  |  |  |  |  |  |  |  |  |  |  |  |  |  |
|  | TPD52L1 |  |  |  |  |  |  |  |  |  |  |  |  |  |  |  |  |  |
|  | TPT1 |  |  |  |  |  |  |  |  |  |  |  |  |  |  |  |  |  |
|  | TRADD |  |  |  |  |  |  |  |  |  |  |  |  |  |  |  |  |  |
|  | TRAF1 |  |  |  |  |  |  |  |  |  |  |  |  |  |  |  |  |  |
|  | TRAF2 |  |  |  |  |  |  |  |  |  |  |  |  |  |  |  |  |  |
|  | TRAF7 |  |  |  |  |  |  |  |  |  |  |  |  |  |  |  |  |  |
|  | TRAP1 |  |  |  |  |  |  |  |  |  |  |  |  |  |  |  |  |  |
|  | TRIAP1 |  |  |  |  |  |  |  |  |  |  |  |  |  |  |  |  |  |
|  | TRIB3 |  |  |  |  |  |  |  |  |  |  |  |  |  |  |  |  |  |
|  | TRIM32 |  |  |  |  |  |  |  |  |  |  |  |  |  |  |  |  |  |
|  | TRIM39 |  |  |  |  |  |  |  |  |  |  |  |  |  |  |  |  |  |
|  | TXNDC12 |  |  |  |  |  |  |  |  |  |  |  |  |  |  |  |  |  |
|  | TYROBP |  |  |  |  |  |  |  |  |  |  |  |  |  |  |  |  |  |
|  | UACA |  |  |  |  |  |  |  |  |  |  |  |  |  |  |  |  |  |
|  | UBB |  |  |  |  |  |  |  |  |  |  |  |  |  |  |  |  |  |
|  | UBE2K |  |  |  |  |  |  |  |  |  |  |  |  |  |  |  |  |  |
|  | UBE4B |  |  |  |  |  |  |  |  |  |  |  |  |  |  |  |  |  |
|  | UBQLN1 |  |  |  |  |  |  |  |  |  |  |  |  |  |  |  |  |  |
|  | UMOD |  |  |  |  |  |  |  |  |  |  |  |  |  |  |  |  |  |
|  | UNC5B |  |  |  |  |  |  |  |  |  |  |  |  |  |  |  |  |  |
|  | URI1 |  |  |  |  |  |  |  |  |  |  |  |  |  |  |  |  |  |
|  | USP28 |  |  |  |  |  |  |  |  |  |  |  |  |  |  |  |  |  |
|  | USP47 |  |  |  |  |  |  |  |  |  |  |  |  |  |  |  |  |  |
|  | VDAC2 |  |  |  |  |  |  |  |  |  |  |  |  |  |  |  |  |  |
|  | VNN1 |  |  |  |  |  |  |  |  |  |  |  |  |  |  |  |  |  |
|  | WDR35 |  |  |  |  |  |  |  |  |  |  |  |  |  |  |  |  |  |
|  | WNT4 |  |  |  |  |  |  |  |  |  |  |  |  |  |  |  |  |  |
|  | WWOX |  |  |  |  |  |  |  |  |  |  |  |  |  |  |  |  |  |
|  | XBP1 |  |  |  |  |  |  |  |  |  |  |  |  |  |  |  |  |  |
|  | YAP1 |  |  |  |  |  |  |  |  |  |  |  |  |  |  |  |  |  |
|  | YBX3 |  |  |  |  |  |  |  |  |  |  |  |  |  |  |  |  |  |
|  | YWHAB |  |  |  |  |  |  |  |  |  |  |  |  |  |  |  |  |  |
|  | YWHAE |  |  |  |  |  |  |  |  |  |  |  |  |  |  |  |  |  |
|  | YWHAG |  |  |  |  |  |  |  |  |  |  |  |  |  |  |  |  |  |
|  | YWHAH |  |  |  |  |  |  |  |  |  |  |  |  |  |  |  |  |  |
|  | YWHAQ |  |  |  |  |  |  |  |  |  |  |  |  |  |  |  |  |  |
|  | YWHAZ |  |  |  |  |  |  |  |  |  |  |  |  |  |  |  |  |  |
|  | ZC3HC1 |  |  |  |  |  |  |  |  |  |  |  |  |  |  |  |  |  |
|  | ZDHHC3 |  |  |  |  |  |  |  |  |  |  |  |  |  |  |  |  |  |
|  | ZMYND11 |  |  |  |  |  |  |  |  |  |  |  |  |  |  |  |  |  |
|  | ZNF205 |  |  |  |  |  |  |  |  |  |  |  |  |  |  |  |  |  |
|  | ZNF385A |  |  |  |  |  |  |  |  |  |  |  |  |  |  |  |  |  |
|  | ZNF385B |  |  |  |  |  |  |  |  |  |  |  |  |  |  |  |  |  |
|  | ZNF622 |  |  |  |  |  |  |  |  |  |  |  |  |  |  |  |  |  |
|  | ZSWIM2 |  |  |  |  |  |  |  |  |  |  |  |  |  |  |  |  |  |

**Supplementary Table 3. Molecular docking of binding energy**

| **Compound** | Binding energy (kcal/mol) | | | | | | | |
| --- | --- | --- | --- | --- | --- | --- | --- | --- |
| IL10 (1ILK) | STAT4(AF-Q14765-F1) | NQO1 (1D4A) | NT5E (4H1S) | AGTR2 (5UNF) | SFRP1(AF-Q8N474-F1) | GLI2(AF-P10070-F1) | HRK(6XY4) |
| Decitabine | -5.0 | -6.6 | -6.9 | -5.9 | -6.5 | -5.5 | -5.1 | -5.1 |
| Folic Acid | -7.0 | -8.9 | -9.9 | -9.0 | -8.9 | -8.7 | -7.4 | -7.0 |

**
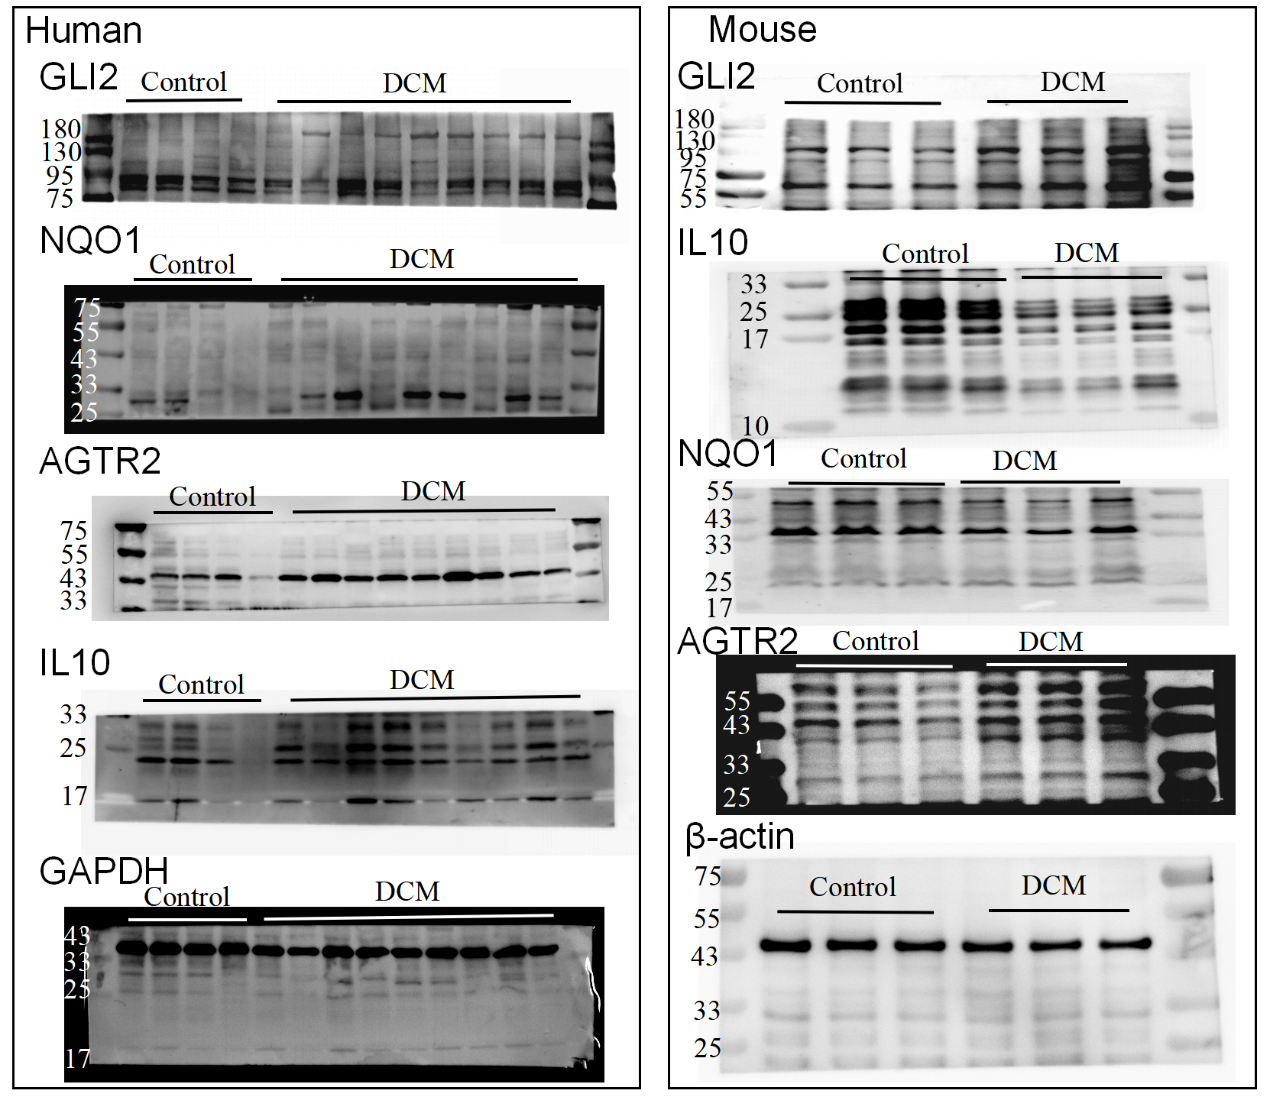
Full uncropped Gels and Blots**
